# Supplementary material for: Synthetic studies on vincorine: access to the 3a,8a-dialkyl-1,2,3,3a,8,8a-hexahydropyrrolo[2,3-b]indole skeleton
Source: Royal Society of Chemistry journal article supplement (doi:10.1039/b907210a), 2009-01-01

## Synthetic studies on vincorine: access to 3a,8a-dialkyl-1,2,3,3a,8,8a-hexahydropyrrolo[2,3-b]indole skeleton

Yoshizumi Yasui, Tomoyo Kinugawa and Yoshiji Takemoto\*

### SUPPORTING INFORMATION

**General.** Unless otherwise noted, all reactions were performed under argon. Pd(PPh<sub>3</sub>)<sub>4</sub> was prepared by using the reported protocol.<sup>1</sup> Analytical thin-layer chromatography was performed with Merck Silica gel 60 and Merck 25 DC-Alufolein. Flash silica gel column chromatography was performed with Kanto Silica gel 60 (spherical, 63-210 μm). Proton nuclear magnetic resonance (<sup>1</sup>H NMR) spectra were recorded on a JEOL JNM-ECA500 KP at 500 MHz. Chemical shifts are reported relative to Me<sub>4</sub>Si (δ 0.00) and toluene-*d*<sub>8</sub> (δ, 7.09). Multiplicity is indicated by one or more of the following: s (singlet); d (doublet); t (triplet); q (quartet); m (multiplet); br (broad). Carbon nuclear magnetic resonance (<sup>13</sup>C NMR) spectra were recorded on a JEOL JNM-ECA500 KP at 126 MHz. Chemical shifts are reported relative to CDCl<sub>3</sub> (δ, 77.2) and toluene-*d*<sub>8</sub> (δ, 20.4). Unless otherwise noted, all NMR spectra were recorded at room temperature. Infrared spectra were recorded on a FT/IR-410 (JASCO). Low resolution mass spectra (LRMS) were recorded on a SHIMADZU PARVUM 2 mass spectrometer or on a JEOL JMS-HX211A.

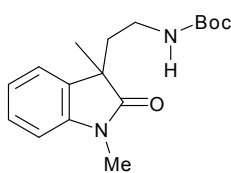

**Carbamate 15:** NaBH<sub>4</sub> (1.84 g, 48.8 mmol) was added to a mixture of (1,3-dimethyl-2-oxoindolin-3-yl)acetonitrile<sup>2</sup> (1.95 g, 9.75 mmol), Boc<sub>2</sub>O (8.50 g, 39 mmol), and CoCl<sub>2</sub>·6H<sub>2</sub>O (5.80 g, 24.4 mmol) in MeOH (30 mL) at 0 °C. After stirring for 2 hr at room temperature, H<sub>2</sub>O, brine, 0.1 M aqueous ethylenediamine tetraacetic acid, and 1.0 M aqueous K<sub>2</sub>CO<sub>3</sub> was added. The aqueous layer was extracted with AcOEt, and the combined organic layers were washed with brine and dried over Na<sub>2</sub>SO<sub>4</sub>. Removal of the solvent under reduced pressure afforded the crude product, which was purified by

<sup>1</sup> Coulson, D. R. *Inorg. Synth.* **1972**, *13*, 121.

<sup>2</sup> Yasui, Y.; Kamisaki, H.; Takemoto, Y. *Org. Lett.* **2008**, *15*, 3303.

silica gel column chromatography (hexane/AcOEt = 10/0→5/5) to give oxindole **15** (2.45 g, 83%) as a colorless oil. Rf 0.38 (silica, hexane/AcOEt = 6/4);  $^1\text{H}$  NMR ( $\delta$ ,  $\text{CDCl}_3$ ) 7.27 (dd,  $J_1 = J_2 = 7.5$  Hz, 1H), 7.21 (d,  $J = 7.5$  Hz, 1H), 7.08 (dd,  $J_1 = J_2 = 7.5$  Hz, 1H), 6.84 (d,  $J_1 = 7.5$  Hz, 1H) 4.52 (br s, 1H), 3.21 (s, 3H), 2.95–2.72 (m, 2H), 2.16–1.93 (m, 2H), 1.38 (s, 9H), 1.37 (s, 3H);  $^{13}\text{C}$  NMR ( $\delta$ ,  $\text{CDCl}_3$ ) 180.5, 155.7, 143.1, 133.3, 128.1, 122.9, 122.8, 108.3, 79.1, 47.1, 37.7, 37.0, 28.5, 26.4, 24.2; IR (NaCl) 3352, 2974, 1703  $\text{cm}^{-1}$ ; LRMS (FAB<sup>+</sup>)  $m/z = 305$  (M+H<sup>+</sup>); Anal. Calcd for  $\text{C}_{17}\text{H}_{24}\text{N}_2\text{O}_3$ : C, 67.08; H, 7.95; N, 9.20. Found: C, 66.84; H, 8.10; N, 8.90.

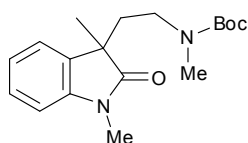

**Oxindole 13:** To a solution of oxindole **15** (2.25 g, 7.40 mmol) in THF (25 mL) was added NaH (ca 60% purity, 444 mg, 11 mmol) at 0 °C. After stirring for 30 min, MeI (0.60 mL, 1.4 g, 9.6 mmol) was added. The reaction mixture was stirred for 7 hr at room temperature, and saturated aqueous  $\text{NaHCO}_3$  was added. The mixture was extracted with AcOEt, and the combined organic layers were washed with brine and dried over  $\text{Na}_2\text{SO}_4$ . Removal of the solvent under reduced pressure afforded the crude product, which was purified by silica gel column chromatography (hexane/AcOEt = 10/0→5/5) to give oxindole **13** (2.15 g, 91%) as a colorless oil. Rf 0.45 (silica, hexane/AcOEt = 6/4);  $^1\text{H}$  NMR ( $\delta$ ,  $\text{CDCl}_3$ ) 7.27–7.21 (m, 2H), 7.08 (dd,  $J_1 = J_2 = 7.5$  Hz, 1H), 6.85 (br s, 1H), 3.22 (s, 3H), 3.12 (br s)\*, 2.86–2.69 (m, 5H), 2.14–1.93 (m, 2H), 1.39 (s, 9H), 1.38 (s, 3H);  $^{13}\text{C}$  NMR ( $\delta$ ,  $\text{CDCl}_3$ ) 180.2, 179.9, 155.5, 143.1, 133.3, 128.0, 122.7, 122.6, 108.2, 79.4, 46.8, 45.1, 44.8, 35.9, 35.1, 34.2, 28.5, 26.3, 24.2; IR (NaCl) 2973, 1697  $\text{cm}^{-1}$ ; LRMS (FAB<sup>+</sup>)  $m/z = 319$  (M+H<sup>+</sup>); Anal. Calcd for  $\text{C}_{18}\text{H}_{26}\text{N}_2\text{O}_3$ : C, 67.90; H, 8.23; N, 8.80. Found: C, 67.63; H, 8.01; N, 8.67. (\* Peak of minor rotamer)

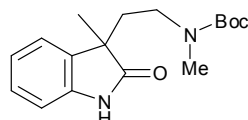

**Oxindole S1<sup>3</sup>:** A solution of carbamate **13** (404 mg, 1.27 mmol) and benzoylperoxide (include ca. 25% water, 1.2 g, 3.8 mmol) in  $\text{CH}_2\text{Cl}_2$  (12 mL) was heated in a sealed tube for 20 hr at 80 °C. After concentrating the reaction mixture, a solution of 2.0 M  $\text{NH}_3$  in

<sup>3</sup> (a) Nakatsuka, S.; Asano, O.; Goto, T. *Heterocycles* **1986**, *24*, 2791. (b) van Henegouwen, W. G. B.; Fieseler, R. M.; Rutjes, F. P. J. T.; Hiemstra, H. *J. Org. Chem.* **2000**, *65*, 8317.

MeOH (20 mL) was added, and the mixture was stirred for 18 hr at room temperature. After concentrating the reaction mixture, saturated aqueous NaHCO<sub>3</sub> was added. The mixture was extracted with AcOEt, and the combined organic layers were washed with brine and dried over Na<sub>2</sub>SO<sub>4</sub>. Removal of the solvent under reduced pressure afforded the crude product, which was purified by silica gel column chromatography (hexane/AcOEt = 10/0→5/5) to give oxindole **S1** (235 mg, 61%) as a colorless oil. Rf 0.48 (silica, hexane/AcOEt = 5/5); <sup>1</sup>H NMR (δ, CDCl<sub>3</sub>) 8.95 (br s, 1H), 8.83 (br s)\*, 7.20 (br s, 2H), 7.05 (dd, *J*<sub>1</sub> = *J*<sub>2</sub> = 7.5 Hz, 1H), 6.94 (br s, 1H), 3.15 (br s)\*, 2.89 (br s, 2H), 2.75 (br s, 3H), 2.71 (br s)\*, 2.15–1.97 (m, 2H), 1.41 (s, 3H), 1.39 (s, 9H); <sup>13</sup>C NMR (δ, CDCl<sub>3</sub>) 183.0, 182.7, 155.6, 140.5, 140.4, 133.8, 128.1, 123.2, 122.9, 122.7, 110.2, 79.6, 79.4, 47.4, 45.2, 44.9, 35.9, 35.1, 34.3, 28.6, 24.3; IR (NaCl) 3247, 2974, 1710 cm<sup>-1</sup>; LRMS (FAB<sup>+</sup>) *m/z* = 305 (M+H<sup>+</sup>); Anal. Calcd for C<sub>17</sub>H<sub>24</sub>N<sub>2</sub>O<sub>3</sub>: C, 67.08; H, 7.95; N, 9.20. Found: C, 66.84; H, 7.96; N, 8.87. (\* Peak of minor rotamer)

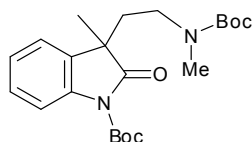

**Imide 9:** A mixture of oxindole **S1** (180 mg, 0.592 mmol), Na<sub>2</sub>CO<sub>3</sub> (365 mg, 3.44 mmol), and Boc<sub>2</sub>O (313 mg, 1.43 mmol) in THF (5.0 mL) was refluxed for 5 hr. The solid was filtered off, and the filtrate was concentrated under reduced pressure. The residue was purified by silica gel column chromatography (hexane/AcOEt = 10/0→7/3) to give imide **9** (221 mg, 92%) as a colorless oil. Rf 0.42 (silica, hexane/AcOEt = 8/2); <sup>1</sup>H NMR (δ, CDCl<sub>3</sub>) 7.85 (br s, 1H), 7.29–7.16 (m, 3H), 3.13 (br s)\*, 2.86 (br s, 2H), 2.72 (br s, 3H), 2.26–2.11 (m, 1H), 2.11–1.89 (m, 1H), 1.65 (s, 9H), 1.43 (s, 3H), 1.39 (s, 9H); <sup>13</sup>C NMR (δ, CDCl<sub>3</sub>) 178.9, 178.5, 155.5, 149.4, 139.1, 132.1, 128.3, 124.7, 122.8, 122.5, 115.2, 84.4, 79.5, 47.2, 45.1, 36.7, 35.8, 34.4, 34.1, 28.5, 28.2, 25.4, 22.8; IR (NaCl) 2977, 2251, 1766, 1730, 1697 cm<sup>-1</sup>; LRMS (FAB<sup>+</sup>) *m/z* = 405 (M+H<sup>+</sup>); Anal. Calcd for C<sub>22</sub>H<sub>32</sub>N<sub>2</sub>O<sub>5</sub>: C, 65.32; H, 7.97; N, 6.93. Found: C, 65.41; H, 8.00; N, 6.84.

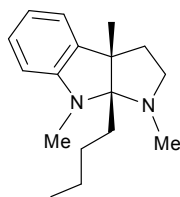

**Hexahydropyrroindole 12 from imide 9:** To a solution of imide **9** (135 mg, 0.334 mmol) and LiCl (75.6 mg, 1.73 mmol) in toluene (4.0 mL) was added *n*-BuLi in hexane (1.6 M, 0.43 mL, 0.69 mmol) at  $-78$  °C. After stirring for 15 min, saturated aqueous NaHCO<sub>3</sub> was added. The mixture was warmed to room temperature, and the aqueous layer was extracted with AcOEt. The combined organic layers were washed with brine and dried over Na<sub>2</sub>SO<sub>4</sub>. Removal of the solvent under reduced pressure afforded the crude product, which was subjected to silica gel chromatography (hexane/AcOEt = 10/0→8/2) to give a colorless oil. To a solution of this oil in CH<sub>2</sub>Cl<sub>2</sub> (2.5 mL) was added TFA (0.11 mL, 170 mg, 1.5 mmol) at 0 °C. After stirring at room temperature for 30 min, saturated aqueous NaHCO<sub>3</sub> was added, and the mixture was extracted with AcOEt. The combined organic layers were washed with brine and dried over Na<sub>2</sub>SO<sub>4</sub>. Removal of the solvent under reduced pressure afforded the crude product. To a solution of the crude mixture and MeI (0.050 mL, 114 mg, 0.80 mmol) in toluene (2.5 mL) was added a solution of KHMDS in toluene (0.50 M, 0.78 mL, 0.39 mmol) at 0 °C. After stirring for 12 hr at room temperature, H<sub>2</sub>O was added, and the mixture was extracted with AcOEt. The combined organic layers were washed with brine and dried over Na<sub>2</sub>SO<sub>4</sub>. Removal of the solvent under reduced pressure afforded the crude product, which was purified by silica gel column chromatography (hexane/AcOEt = 10/0→0/10) to give pyrroindole **12** (21.6 mg, 26%) as a colorless oil.

**Hexahydropyrroindole 12 from carbamate 13 (two-pot method):** To a solution of carbamate **13** (198 mg, 0.621 mmol) and LiCl (181 mg, 3.91 mmol) in THF (3.5 mL) was added *n*-BuLi in hexane (1.6 M, 1.0 mL, 1.6 mmol) at  $-78$  °C. After stirring for 15 min, H<sub>2</sub>O was added, and the mixture was extracted with AcOEt. The combined organic layers were washed with brine and dried over Na<sub>2</sub>SO<sub>4</sub>. Removal of the solvent under reduced pressure afforded the crude product. To a solution of the crude mixture in CH<sub>2</sub>Cl<sub>2</sub> (3.0 mL) was added TFA (0.180 mL, 276 mg, 2.48 mmol) at 0 °C. After stirring for 2 hr at room temperature, saturated aqueous NaHCO<sub>3</sub> was added, and the mixture was extracted with AcOEt. The combined organic layers were washed with brine and dried over Na<sub>2</sub>SO<sub>4</sub>. Removal of the solvent under reduced pressure afforded the crude product, which was purified by silica gel column chromatography (hexane/AcOEt = 10/0→0/10) to give pyrroindole **12** (140 mg, 87%) as a colorless oil.

**Hexahydropyrroindole 12 from carbamate 13 (one-pot method):** To a solution of carbamate **13** (151 mg, 0.480 mmol) and LiCl (135 mg, 2.88 mmol) in THF (3.0 mL) was added a solution of *n*-BuLi in hexane (1.6 M, 0.73 mL, 1.2 mmol) at  $-78\text{ }^{\circ}\text{C}$ . After stirring for 15 min, the reaction mixture was warmed to  $0\text{ }^{\circ}\text{C}$ , and farther *n*-BuLi in hexane (1.6 M, 0.870 mL, 1.44 mmol) was added. After stirring for 5 min,  $\text{H}_2\text{O}$  was added, and mixture was extracted with AcOEt. The combined organic layers were washed with brine and dried over  $\text{Na}_2\text{SO}_4$ . Removal of the solvent under reduced pressure afforded the crude product, which was purified by silica gel column chromatography (hexane/AcOEt = 10/0 $\rightarrow$ 0/10) to give pyrroindole **12** (112 mg, 92%) as a colorless oil.  $^1\text{H}$  NMR ( $\delta$ ,  $\text{CDCl}_3$ ) 7.04 (dd,  $J_1 = J_2 = 7.5\text{ Hz}$ , 1H), 6.93 (d,  $J = 7.5\text{ Hz}$ , 1H), 6.58 (dd,  $J_1 = J_2 = 7.5\text{ Hz}$ , 1H), 6.21 (d,  $J_1 = 7.5\text{ Hz}$ , 1H), 2.87 (s, 3H), 2.79–2.76 (m, 1H), 2.45 (s, 3H), 2.43–2.39 (m, 1H), 2.03 (ddd,  $J_1 = 15.5\text{ Hz}$ ,  $J_2 = 12.0\text{ Hz}$ ,  $J_3 = 5.0\text{ Hz}$ , 1H), 1.91–1.84 (m, 2H), 1.71 (ddd,  $J_1 = 15.5\text{ Hz}$ ,  $J_2 = 12.0\text{ Hz}$ ,  $J_3 = 4.5\text{ Hz}$ , 1H), 1.46 (s, 3H), 1.33–1.26 (m, 2H), 1.26–1.16 (m, 1H), 1.07–0.99 (m, 1H), 0.86 (t,  $J = 7.5\text{ Hz}$ , 3H);  $^{13}\text{C}$  NMR ( $\delta$ ,  $\text{CDCl}_3$ ) 152.0, 136.3, 127.8, 121.5, 116.1, 103.1, 94.2, 55.1, 52.7, 42.3, 36.0, 32.5, 31.4, 25.9, 24.2, 23.6, 14.2; Rf 0.28 (silica, hexane/AcOEt = 5/5); IR (NaCl) 2955, 1604,  $1495\text{ cm}^{-1}$ ; LRMS (FAB $^+$ )  $m/z = 258\text{ (M}^+)$ ; Anal. Calcd for  $\text{C}_{17}\text{H}_{26}\text{N}_2$ : C, 79.02; H, 10.14; N, 10.84. Found: C, 78.86; H, 9.99; N, 10.81.

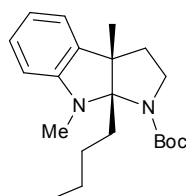

**Hexahydropyrroindole 16:** To a solution of oxindole **15** (256 mg, 0.842 mmol) and LiCl (348 mg, 8.21 mmol) in THF (3.0 mL) was added *n*-BuLi in hexane (1.6 M, 2.0 mL, 3.4 mmol) at  $-78\text{ }^{\circ}\text{C}$ . After stirring for 2 hr, saturated aqueous  $\text{NaHCO}_3$  was added. The mixture was warmed to room temperature, and extracted with AcOEt. The combined organic layers were washed with brine and dried over  $\text{Na}_2\text{SO}_4$ . Removal of the solvent under reduced pressure afforded the crude product, which was purified by silica gel column chromatography (hexane/AcOEt = 10/0 $\rightarrow$ 9/1) to give pyrroindole **16** (285 mg, 96%) as a colorless oil. Rf 0.85 (silica, hexane/AcOEt = 8/2);  $^1\text{H}$  NMR ( $\delta$ , toluene,  $100\text{ }^{\circ}\text{C}$ ) 7.03 (dd,  $J_1 = J_2 = 7.5\text{ Hz}$ , 1H), 6.81 (d,  $J = 7.5\text{ Hz}$ , 1H), 6.65 (d,  $J_1 = J_2 = 7.5\text{ Hz}$ , 1H), 6.26 (d,  $J = 7.5\text{ Hz}$ , 1H), 3.54 (dd,  $J_1 = J_2 = 9.0\text{ Hz}$ , 1H), 3.02 (s, 3H), 3.00–2.92 (m, 2H), 1.93–1.89 (m, 1H), 1.86–1.80 (m, 1H), 1.76–1.70 (m, 1H), 1.41 (s, 9H), 1.38–1.29 (m, 4H), 1.15 (s, 3H), 0.95 (t,  $J = 7.5\text{ Hz}$ , 3H);  $^{13}\text{C}$  NMR ( $\delta$ , toluene,  $100\text{ }^{\circ}\text{C}$ ) 154.5, 150.6, 135.1,

125.1, 121.3, 117.9, 106.2, 92.7, 78.8, 56.6, 47.4, 36.8, 30.9, 30.8, 28.7, 27.5, 23.6, 22.7, 14.2; IR (NaCl) 2961, 2360, 1699  $\text{cm}^{-1}$ ; LRMS (FAB<sup>+</sup>)  $m/z = 344$  (M<sup>+</sup>); Anal. Calcd for  $\text{C}_{21}\text{H}_{32}\text{N}_2\text{O}_2$ : C, 73.22; H, 9.36; N, 8.13. Found: C, 73.19; H, 9.28; N, 8.21.

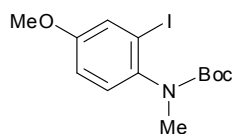

**Carbamate 18:** To a solution of *tert*-butyl 2-iodo-4-methoxyphenylcarbamate<sup>4</sup> (1.69 g, 4.86 mmol) in DMF (16 mL) was added a suspension of NaH (55% pure, 303 mg, 6.94 mmol) in DMF (5.0 mL) at 0 °C. After stirring for 30 min, MeI (0.46 mL, 1.0 g, 7.4 mmol) was added. The reaction mixture was stirred for 3 hr at room temperature, and H<sub>2</sub>O was added. The mixture was extracted with AcOEt, and the combined organic layers were washed with brine and dried over Na<sub>2</sub>SO<sub>4</sub>. Removal of the solvent under reduced pressure afforded the crude product, which was purified by silica gel column chromatography (hexane/AcOEt = 10/0→8/2) to give carbamate **18** (1.61 mg, 91%) as a yellow oil. Rf 0.57 (silica, hexane/AcOEt = 8/2); <sup>1</sup>H NMR ( $\delta$ , CDCl<sub>3</sub>) 7.37 (s)\*, 7.35 (s, 1H), 7.16 (d,  $J = 8.5$  Hz)\*, 7.08 (d,  $J = 8.5$  Hz, 1H), 6.88–6.86 (m, 1H), 3.80 (s, 3H), 3.77 (s)\*, 3.12 (s)\*, 3.11 (s, 3H), 1.53 (s)\*, 1.36 (s, 9H); <sup>13</sup>C NMR ( $\delta$ , CDCl<sub>3</sub>) 158.8\*, 158.5, 154.7, 139.2, 129.2\*, 128.6, 124.5\*, 124.1, 115.4\*, 115.0, 99.8\*, 99.7, 80.5\*, 80.1, 55.9\*, 55.8, 37.7\*, 36.7, 28.6\*, 28.4; IR (NaCl) 2975, 1703  $\text{cm}^{-1}$ ; LRMS (FAB<sup>+</sup>)  $m/z = 363$  (M<sup>+</sup>); Anal. Calcd for  $\text{C}_{13}\text{H}_{18}\text{INO}_3$ : C, 42.99; H, 5.00; N, 3.86. Found: C, 43.12; H, 4.89; N, 3.84. (\* Peak of minor rotamer)

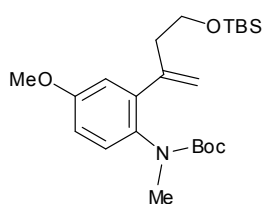

**Alkenylaniline 20:** To a solution of [(3-bromo-3-butenyl)oxy]-*tert*-butyl dimethylsilane (**19**) (272 mg, 1.33 mmol)<sup>5</sup> in THF (5.0 mL) was added *n*-BuLi in hexane (2.8 M, 0.60 mL, 1.7 mmol) at -78 °C. After stirring the mixture for 45 min at -78 °C, a solution of ZnCl<sub>2</sub> (210 mg, 1.54 mmol) in THF (5.0 mL) was added. The reaction mixture was stirred for 15 min at 0 °C, and a solution of iodoaniline **18** (301 mg, 0.829 mmol) in THF (5.0 mL) and Pd(PPh<sub>3</sub>)<sub>4</sub> (105 mg, 0.0908 mmol) was added. After refluxing for 16 hr, the mixture

<sup>4</sup> Kondo, Y.; Kojima, S.; Sakamoto, T. *J. Org. Chem.* **1997**, *62*, 6507.

<sup>5</sup> Magas, P.; Quagliato, D. *J. Org. Chem.* **1985**, *50*, 1621.

was cooled to room temperature and H<sub>2</sub>O was added, and the mixture was extracted with AcOEt. The combined organic layers were washed with brine and dried over Na<sub>2</sub>SO<sub>4</sub>. Removal of the solvent under reduced pressure afforded the crude product, which was purified by silica gel column chromatography (hexane/AcOEt = 10/0→9/1) to give alkenylaniline **20** (323 mg, 93%) as a colorless oil. Rf 0.85 (silica hexane/AcOEt = 8/2); <sup>1</sup>H NMR (δ, CDCl<sub>3</sub>) 7.09 (d, *J* = 8.5 Hz)\*, 6.97 (d, *J* = 8.5 Hz, 1H), 6.82–6.70 (m, 2H), 5.17 (s, 1H), 5.05 (s, 1H), 3.80 (s, 3H), 3.67–3.59 (m, 2H), 3.05 (s, 3H), 2.57–2.55 (m, 2H), 1.48 (s)\*, 1.34 (s, 9H), 0.88 (s, 9H), 0.00 (s, 6H); <sup>13</sup>C NMR (δ, CDCl<sub>3</sub>) 158.1, 155.5, 146.0, 141.4, 134.1, 129.5, 116.5, 115.1, 113.3, 79.9, 61.8, 55.5, 39.6, 37.5, 28.6, 28.5, 26.1, 18.4, –5.2; IR (NaCl) 2929, 1700 cm<sup>-1</sup>; LRMS (FAB<sup>+</sup>) *m/z* = 422 (M+H<sup>+</sup>); Anal. Calcd for C<sub>23</sub>H<sub>39</sub>NO<sub>4</sub>Si: C, 65.52; H, 9.32; N, 3.32. Found: C, 65.41; H, 9.28; N, 3.44. (\* Peak of minor rotamer)

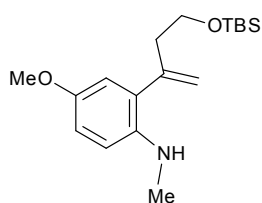

**Aniline 21:** To a solution of TMSOTf (0.750 mL, 4.16 mmol) in CH<sub>2</sub>Cl<sub>2</sub> (4.0 mL) was added a solution of alkenylaniline **20** (1.46 g, 3.47 mmol) and 2,6-lutidine (0.610 mL, 5.24 mmol) in CH<sub>2</sub>Cl<sub>2</sub> (11 mL) at 0 °C. After stirring for 30 min, the reaction mixture was poured into saturated aqueous NaHCO<sub>3</sub>. The mixture was extracted with AcOEt, and the combined organic layers were washed with brine and dried over Na<sub>2</sub>SO<sub>4</sub>. Removal of the solvent under reduced pressure afforded the crude product, which was purified by silica gel column chromatography (hexane/AcOEt = 10/0→9/1) to give aniline **21** (1.10 g, 95%) as a colorless oil. Rf 0.72 (silica, hexane/AcOEt = 8/2); <sup>1</sup>H NMR (δ, CDCl<sub>3</sub>) 6.77 (dd, *J*<sub>1</sub> = 8.5 Hz, *J*<sub>2</sub> = 2.9 Hz, 1H), 6.61 (d, *J* = 2.9 Hz, 1H), 6.55 (d, *J* = 8.5 Hz, 1H), 5.29 (s, 1H), 5.10 (s, 1H), 3.98 (s, 1H), 3.74 (s, 3H), 3.65 (t, *J* = 6.3 Hz, 2H), 2.77 (s, 3H), 2.54 (t, *J* = 6.3 Hz, 2H), 0.89 (s, 9H), 0.03 (s, 6H); <sup>13</sup>C NMR (δ, CDCl<sub>3</sub>) 151.3, 144.6, 141.0, 129.7, 117.2, 115.2, 113.3, 111.0, 61.3, 56.0, 40.8, 31.8, 26.1, 18.5, –5.1; IR (NaCl) 3393, 2929 cm<sup>-1</sup>; LRMS (FAB<sup>+</sup>) *m/z* = 321 (M<sup>+</sup>); Anal. Calcd for C<sub>18</sub>H<sub>31</sub>NO<sub>2</sub>Si: C, 67.24; H, 9.72; N, 4.36. Found: C, 67.51; H, 9.68; N, 4.36.

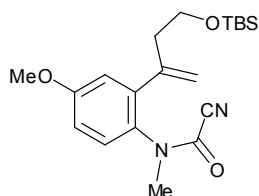

**Cyanoformamide 22:** To a solution of carbonyl cyanide<sup>6</sup> (ca. 1 M in Et<sub>2</sub>O, 15 mL) was added a solution of aniline **21** (358 mg, 1.12 mmol) in Et<sub>2</sub>O (3.0 mL) at 0 °C. After stirring for 15 min, the reaction mixture was concentrated under reduced pressure and the obtained residue was purified by silica gel column chromatography (hexane/AcOEt = 10/0→7/3) to give cyanoformamide **22** (408 mg, 97%) as a colorless oil. R<sub>f</sub> 0.52 (silica, hexane/AcOEt = 8/2); <sup>1</sup>H NMR (δ, CDCl<sub>3</sub>) 7.14 (d, *J* = 8.5 Hz, 1H), 7.03 (d, *J* = 8.5 Hz)\*, 6.89 (dd, *J*<sub>1</sub> = 8.5 Hz, *J*<sub>2</sub> = 2.9 Hz, 1H), 6.85 (d, *J* = 2.9 Hz, 1H), 6.81 (d, *J* = 2.9 Hz)\*, 5.34 (s, 1H), 5.25 (s)\*, 5.13 (s, 1H), 5.04 (s)\*, 3.84 (s, 3H), 3.81(s)\*, 3.75–3.66 (m, 2H), 3.49 (s)\*, 3.23 (s, 3H), 2.51 (t, *J* = 6.3 Hz, 2H), 0.87 (s, 9H), 0.02 (s, 6H); <sup>13</sup>C NMR (δ, CDCl<sub>3</sub>) 160.5, 145.7, 143.6, 143.1, 130.0, 129.9, 118.8, 116.3, 114.0, 111.2, 61.3, 55.7, 40.0, 37.0, 26.0, 18.4, -5.2; IR (NaCl) 2929, 1686 cm<sup>-1</sup>; LRMS (FAB<sup>+</sup>) = 375 (M+H<sup>+</sup>); Anal. Calcd for C<sub>20</sub>H<sub>30</sub>N<sub>2</sub>O<sub>3</sub>Si: C, 64.13; H, 8.07; N, 7.48. Found: C, 64.00; H, 7.91; N, 7.50. (\* Peak of minor rotamer)

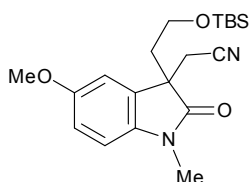

**Oxindole 23:** A solution of cyanoformamide **22** (444 mg, 1.19 mmol) and Pd(PPh<sub>3</sub>)<sub>4</sub> (141 mg, 0.122 mmol) in xylene (5.0 mL) was stirred for 30 min at 130 °C, and the mixture was subjected directly to silica gel column chromatography (hexane/AcOEt = 10/0→5/5) to give oxindole **23** (440 mg, 98%) as a colorless oil. R<sub>f</sub> 0.35 (silica, hexane/AcOEt = 8/2); <sup>1</sup>H NMR (δ, CDCl<sub>3</sub>) 7.04 (d, *J* = 2.9 Hz, 1H), 6.87 (dd, *J*<sub>1</sub> = 8.5 Hz, *J*<sub>2</sub> = 2.9 Hz, 1H), 6.79 (d, *J* = 8.5 Hz, 1H), 3.82 (s, 3H), 3.50–3.42 (m, 2H), 3.19 (s, 3H), 2.74 (d, *J* = 16.5 Hz, 1H), 2.43 (d, *J* = 16.5 Hz, 1H), 2.26 (ddd, *J*<sub>1</sub> = 14.0 Hz, *J*<sub>2</sub> = 8.0 Hz, *J*<sub>3</sub> = 6.5 Hz, 1H), 2.16 (ddd, *J*<sub>1</sub> = 14.0 Hz, *J*<sub>2</sub> = *J*<sub>3</sub> = 5.0 Hz, 1H), 0.78 (s, 9H), -0.11 (s, 6H); <sup>13</sup>C NMR (δ, CDCl<sub>3</sub>) 176.7, 156.4, 137.1, 130.2, 116.7, 113.7, 111.2, 109.1, 59.2, 56.0, 48.0, 38.0, 26.8, 26.7, 25.9, 18.3, -5.5; IR (NaCl) 2360, 1720 cm<sup>-1</sup>; LRMS (EI<sup>+</sup>) *m/z* = 375 (M+H<sup>+</sup>); Anal. Calcd for C<sub>20</sub>H<sub>30</sub>N<sub>2</sub>O<sub>3</sub>Si: C, 64.13; H, 8.07; N, 7.48. Found: C, 63.19; H, 7.68; N, 7.23.

<sup>6</sup> Linn, W. J.; Webster, O. W.; Benson, R. E. *J. Am. Chem. Soc.* **1965**, *87*, 3651.



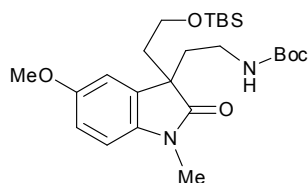

**Carbamate 24:** NaBH<sub>4</sub> (448 mg, 11.9 mmol) was added to a solution of oxindole **23** (885 mg, 3.74 mmol), Boc<sub>2</sub>O (2.06 g, 9.48 mmol), and CoCl<sub>2</sub>·6H<sub>2</sub>O (1.41 g, 5.95 mmol) in MeOH (23 mL) at 0 °C. After stirring for 2 hr at room temperature, H<sub>2</sub>O, brine, 0.1 M aqueous ethylenediamine tetraacetic acid and 1.0 M aqueous K<sub>2</sub>CO<sub>3</sub> were added successively. The mixture was extracted with AcOEt, and the combined organic layers were washed with brine and dried over Na<sub>2</sub>SO<sub>4</sub>. Removal of the solvent under reduced pressure afforded the crude product, which was purified by silica gel column chromatography (hexane/AcOEt = 10/0→5/5) to give oxindole **24** (1.03g, 91%) as a colorless oil. R<sub>f</sub> 0.45 (silica CHCl<sub>3</sub>/AcOEt = 9/1); <sup>1</sup>H NMR (δ, CDCl<sub>3</sub>) 6.79 (s, 1H), 6.78 (d, *J* = 8.0 Hz, 1H), 6.71 (d, *J* = 8.0 Hz, 1H), 4.40 (br s, 1H), 3.80 (s, 3H), 3.38–3.29 (m, 2H), 3.16 (s, 3H), 2.89–2.70 (m, 2H), 2.21 (ddd, *J*<sub>1</sub> = 14.0, *J*<sub>2</sub> = *J*<sub>3</sub> = 7.0, 1H), 2.08 (ddd, *J*<sub>1</sub> = 14.0, *J*<sub>2</sub> = *J*<sub>3</sub> = 7.0 Hz, 1H), 2.01–1.92 (m, 2H), 1.37 (s, 9H), 0.77 (s, 9H), -0.13 (s, 6H); <sup>13</sup>C NMR (δ, CDCl<sub>3</sub>) 178.9, 156.1, 155.6, 137.2, 132.3, 112.1, 110.7, 108.3, 78.8, 59.1, 55.7, 50.0, 40.1, 38.0, 36.4, 28.4, 26.2, 25.8, 18.1, -5.58, -5.62; IR (NaCl) 3352, 2929, 1703 cm<sup>-1</sup>; LRMS (FAB<sup>+</sup>) *m/z* = 478 (M<sup>+</sup>); Anal. Calcd for C<sub>25</sub>H<sub>42</sub>N<sub>2</sub>O<sub>5</sub>Si: C, 62.73; H, 8.84; N, 5.85. Found: C, 62.74; H, 9.05; N, 5.72.

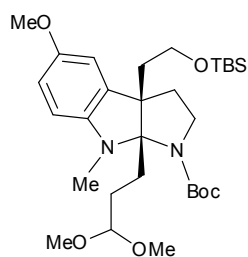

**Pyrroloindole 25:** To a solution of 3,3-dimethoxypropyl bromide<sup>7</sup> (1.25 g, 6.83 mmol) in Et<sub>2</sub>O was added *t*BuLi in pentane (1.8 M, 7.7 mL, 13.9 mmol) at -78 °C. After stirring for 10 min at -78 °C, the reaction mixture was slowly warmed to 0 °C. The solvent was evaporated at 0 °C and THF (5.0 mL) was added. The concentration of the alkyl lithium in this reaction mixture was determined to be 0.80 M by titration. At -78 °C, to a solution of oxindole **24** (256 mg, 0.842 mmol) and LiCl (348 mg, 8.21 mmol) in THF (3.0 mL) was added the solution of 3,3-dimethoxypropyl lithium in THF (0.80 M, 2.6 mL, 2.1 mmol) that prepared above. After stirring for 16 hr at -60 °C, saturated aqueous

<sup>7</sup> Lee, T. V.; Porter, J. R. *Org. Synth.* **1995**, *72*, 189.

NaHCO<sub>3</sub> was added. The mixture was warmed to room temperature, and extracted with AcOEt. The combined organic layers were washed with brine and dried over Na<sub>2</sub>SO<sub>4</sub>. Removal of the solvent under reduced pressure afforded the crude product, which was purified by silica gel column chromatography (hexane/AcOEt = 10/0→9/1) to give pyrroloindole **25** (285 mg, 96%) as a colorless oil. R<sub>f</sub> 0.82 (silica, hexane/AcOEt = 8/2); f 0.82 (silica, hexane/AcOEt = 8/2); <sup>1</sup>H NMR (δ, toluene, 100 °C) 6.72 (d, *J* = 2.5 Hz, 1H), 6.61 (dd, *J*<sub>1</sub> = 8.0 Hz, *J*<sub>2</sub> = 2.5 Hz, 1H), 6.19 (d, *J* = 8.0 Hz, 1H), 4.41 (t, *J* = 5.5 Hz, 1H), 3.73–3.68 (m, 1H), 3.61–3.53 (m, 1H), 3.53 (s, 3H), 3.26 (s, 6H), 3.17 (br s, 1H), 3.02–2.96 (m, 1H), 2.99 (br s, 3H), 2.13–2.08 (m, 2H), 2.01–1.94 (m, 2H), 1.90–1.79 (m, 3H), 1.76–1.69 (m, 1H), 1.40 (s, 9H), 0.93 (s, 9H), 0.02 (s, 6H); <sup>13</sup>C HMR (δ, toluene, 100 °C); 154.5, 153.9, 145.6, 133.6, 113.7, 111.4, 106.8, 105.9, 93.9, 78.9, 60.2, 56.1, 53.3, 52.4, 48.1, 38.5, 35.1, 31.6, 29.1, 28.6, 26.3, 25.8, 18.6, –5.06, –5.10; IR (NaCl) 2954, 1698 cm<sup>-1</sup>; LRMS (FAB<sup>+</sup>) *m/z* = 564 (M<sup>+</sup>); Anal. Calcd for C<sub>30</sub>H<sub>52</sub>N<sub>2</sub>O<sub>6</sub>Si: C, 63.79; H, 9.28; N, 4.96. Found: C, 63.88; H, 9.38; N, 4.90.

M.NHboc.1H-1.als  
 single\_pulse  
 17-02-2009 16:07:57  
 1H  
 single\_pulse.ex2  
 500.16 MHz  
 2.41 KHz  
 6.01 Hz  
 13107  
 7507.39 Hz  
 8  
 1.7459 sec  
 5.0000 sec  
 6.35 usec  
 1H  
 21.5 c  
 CDCl3  
 0.00 ppm  
 1.20 Hz  
 32  
 RGAIN

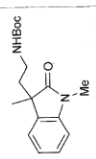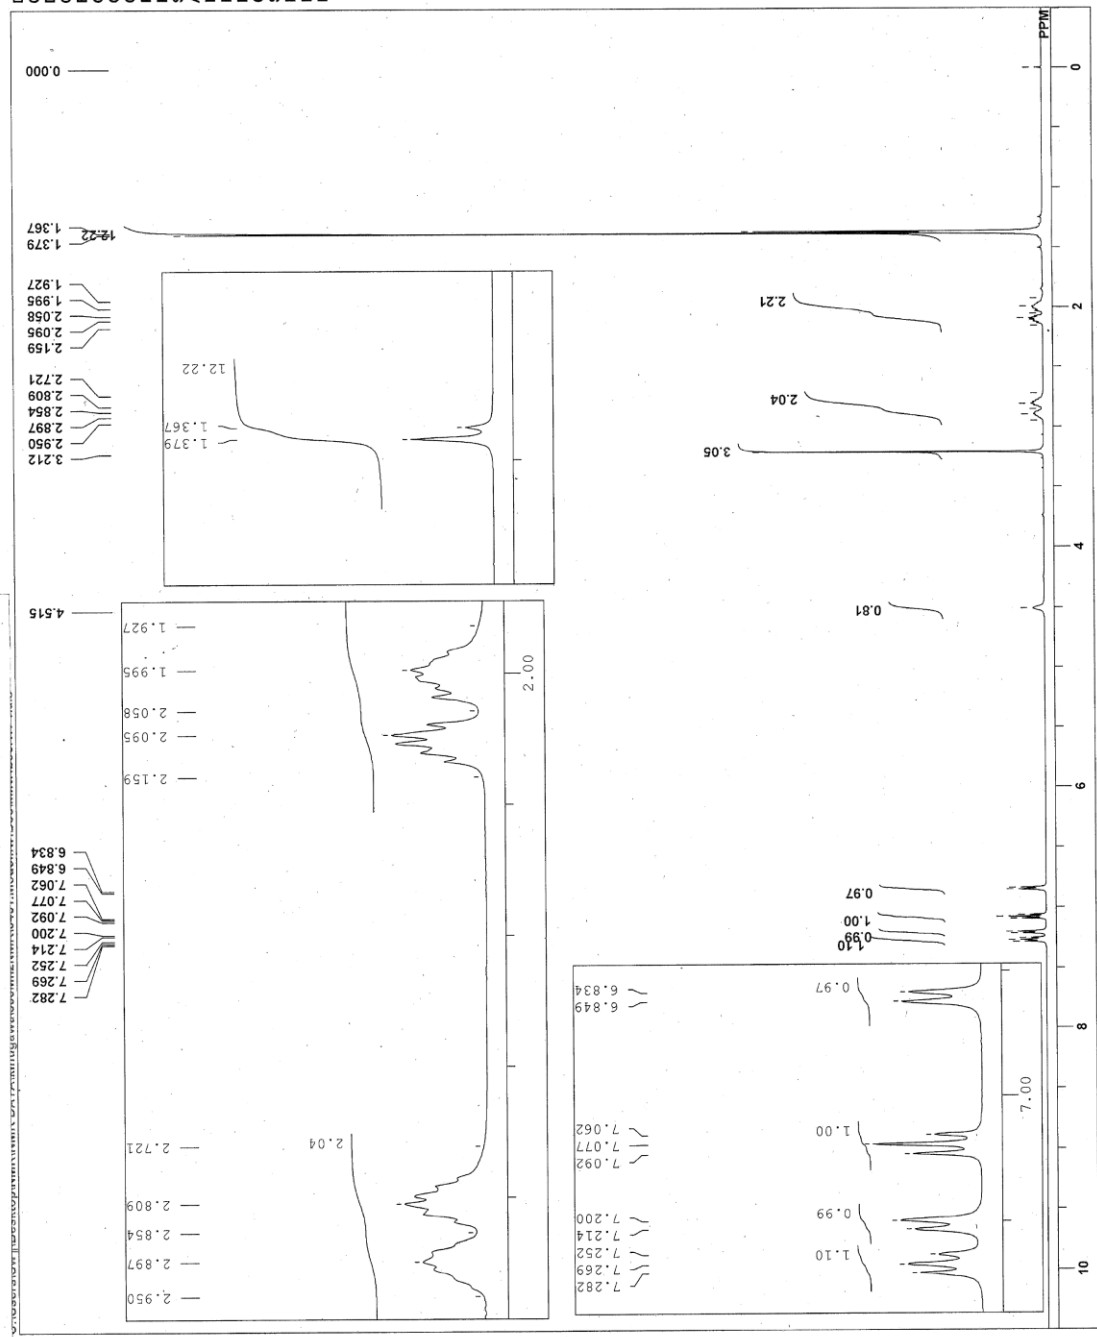

DFILE M.NHboc.13C-1.a1s  
COMNT single pulse decoupled gated N  
DATIM 17-02-2009 16:55:57  
OBNUC 13C  
EXMOD single pulse\_dec  
OBFRQ 125.77 MHz  
OBFIN 7.87 KHz  
OBFIN 4.21 Hz  
POINT 26214  
FREQU 31446.06 Hz  
SCANS 1000  
AQTM 0.8336 sec  
PD 2.0000 sec  
PW1 3.50 usec  
IRNUC 1H 22.1 c  
CTEMP CDCl3  
SOLVT 77.20 ppm  
EXREF BF 1.20 Hz  
RGAIN 80

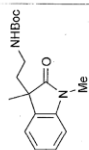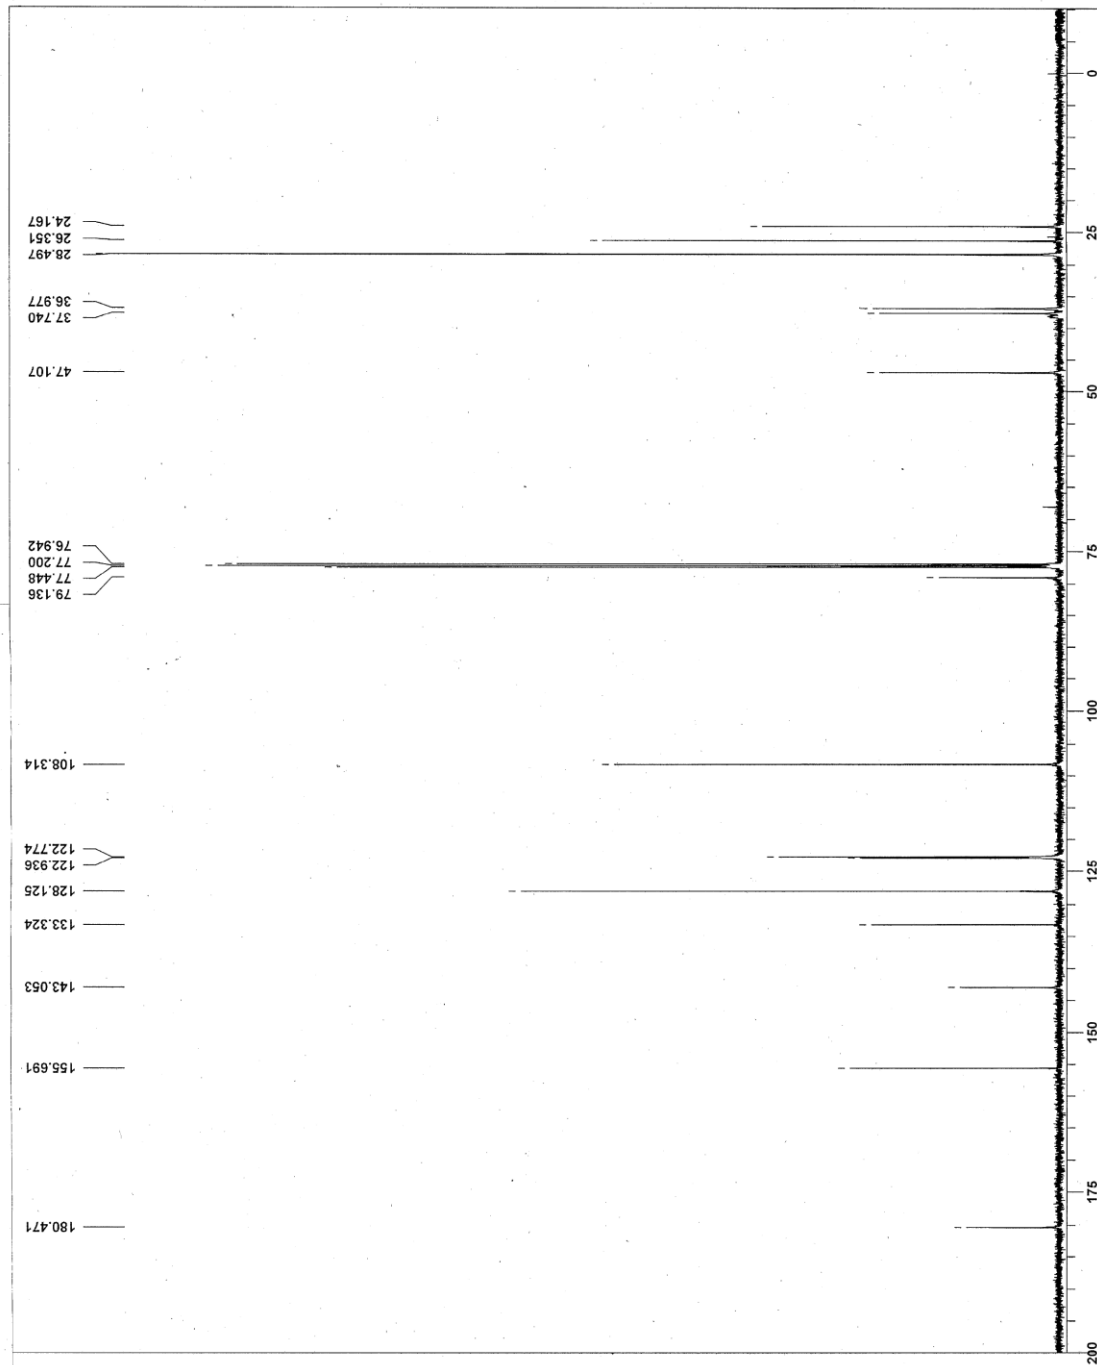



DFILE M.MMeBoc.13CCC-1.a1s  
COMINT single pulse decoupled gated N  
DATIM 02-03-2009 22:59:17  
OBNUC 13C  
EXMOD single pulse dec  
OBFREQ 125.77 MHz  
OBSFREQ 7.87 KHz  
OBSF1 4.21 Hz  
POINT 26214  
FREQ 31446.06 Hz  
SCANS 501  
ACQTM 0.8336 sec  
PD 2.0000 sec  
PW1 3.50 usec  
IRNUC 1H 22.6 c  
CTEMP CDCL3  
SOLVENT 77.20 ppm  
EXREF BF 1.20 Hz  
RGAIN 60

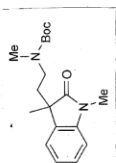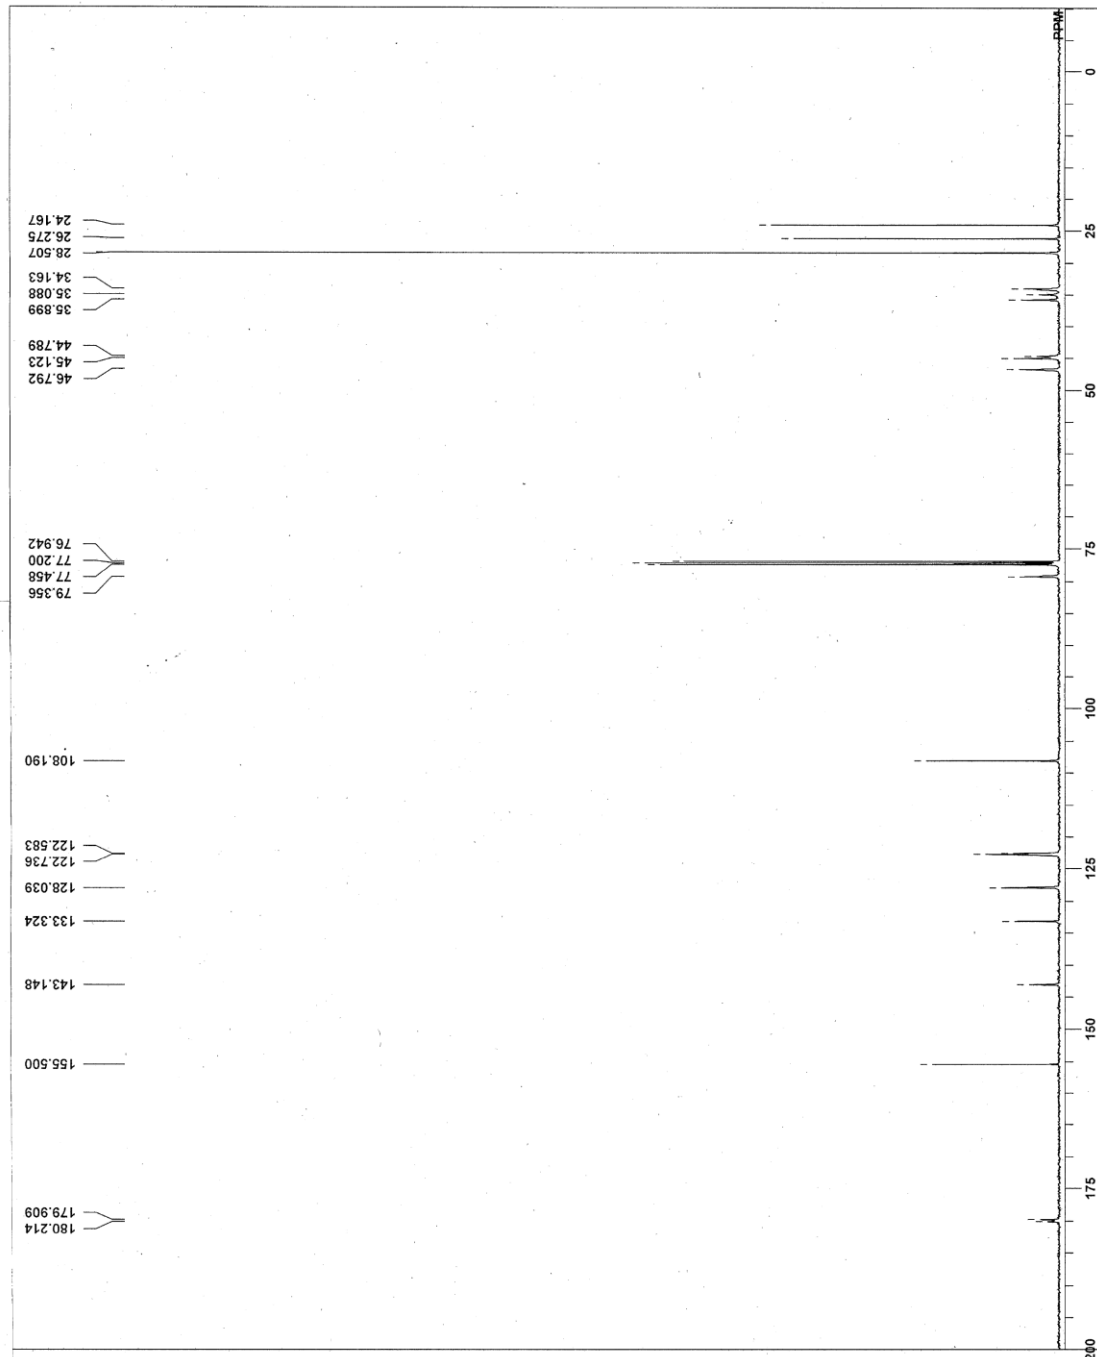

D:\FILE M.deMe.1H-1.als  
 COMNT single pulse  
 DATIM 21-02-2009 17:10:12  
 OBNUC 1H  
 EXMOD single pulse.ex2  
 OBFRQ 500.16 MHz  
 OBSFT 2.41 KHz  
 OBFIN 6.01 Hz  
 POINT 13107  
 FREQU 7507.39 Hz  
 SCANS 8  
 ACQTM 1.7459 sec  
 PD 5.0000 sec  
 PW1 6.35 usec  
 IRNUC 1H  
 CTMP 21.1 c  
 SLVNT CDCl3  
 EXREF 0.00 ppm  
 BF 120 Hz  
 RGAIN 36

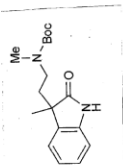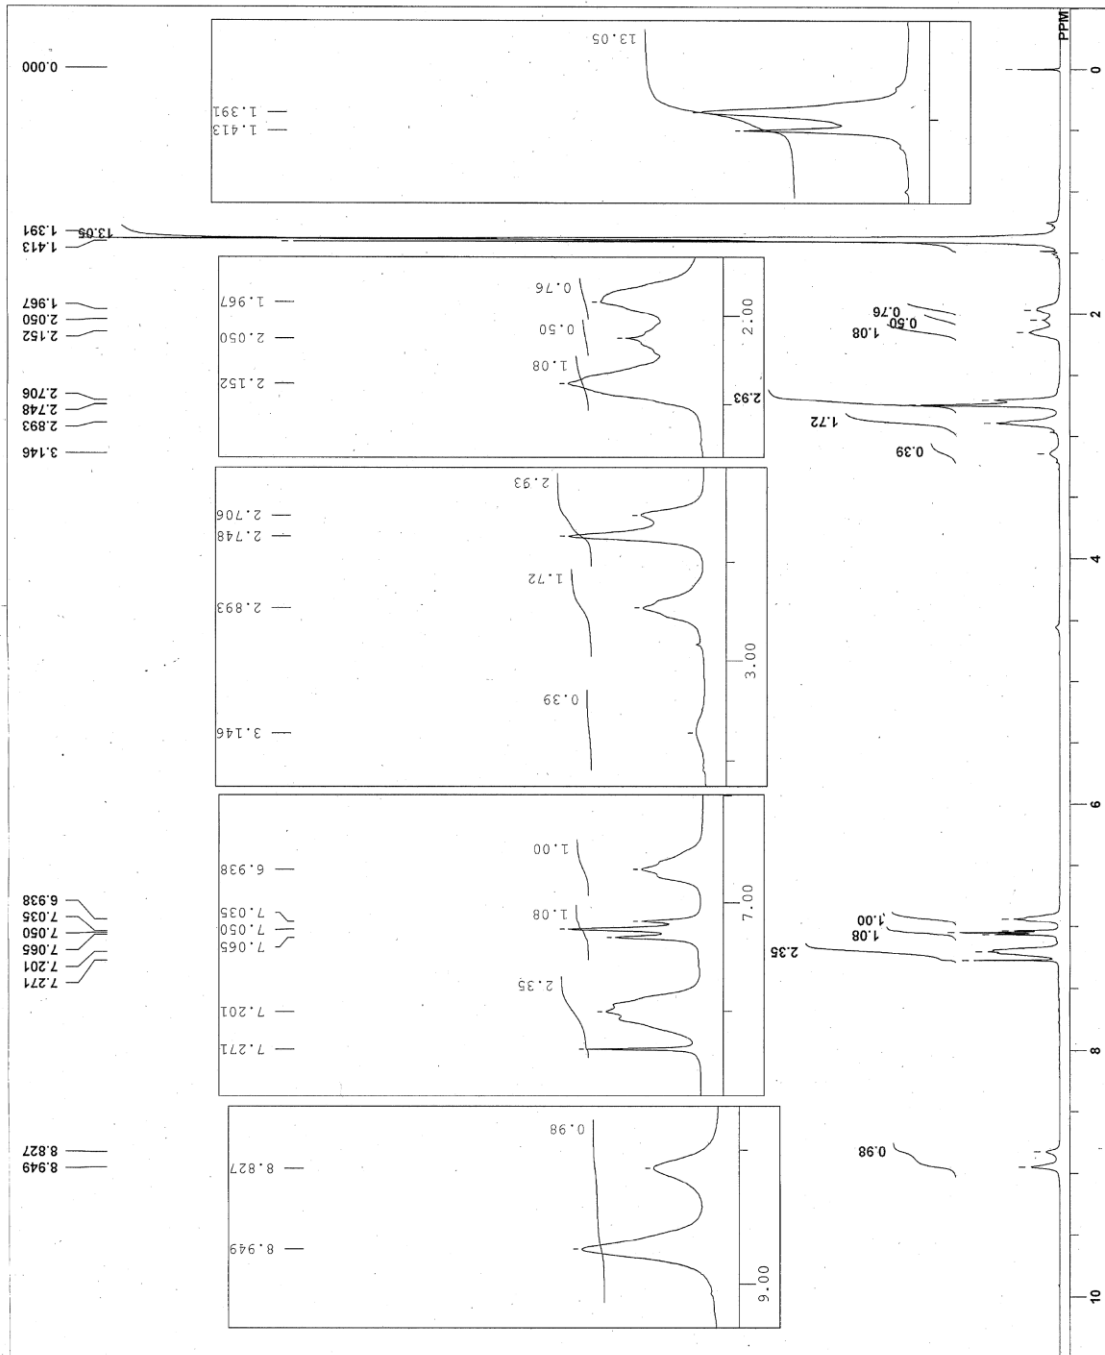

M.deMe.13C-1.als  
single pulse decoupled gated N

DFILE  
COMNT  
DATIM  
OBNUC  
EXMOD  
EXFRQ  
OBSFRQ  
OBSFT  
POINT  
FREQU  
SCANS  
ACQTM  
PD  
PW1  
IRNUC  
CTEMP  
SOLVT  
EXREF  
BF  
RGAIN

single pulse decoupled gated N  
13C  
125.77 MHz  
7.87 KHz  
4.21 Hz  
26214  
31446.06 Hz  
1000  
0.8336 sec  
2.0000 sec  
3.50 usec  
1H  
21.6 c  
CDCL3  
77.20 ppm  
1.20 Hz  
60

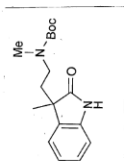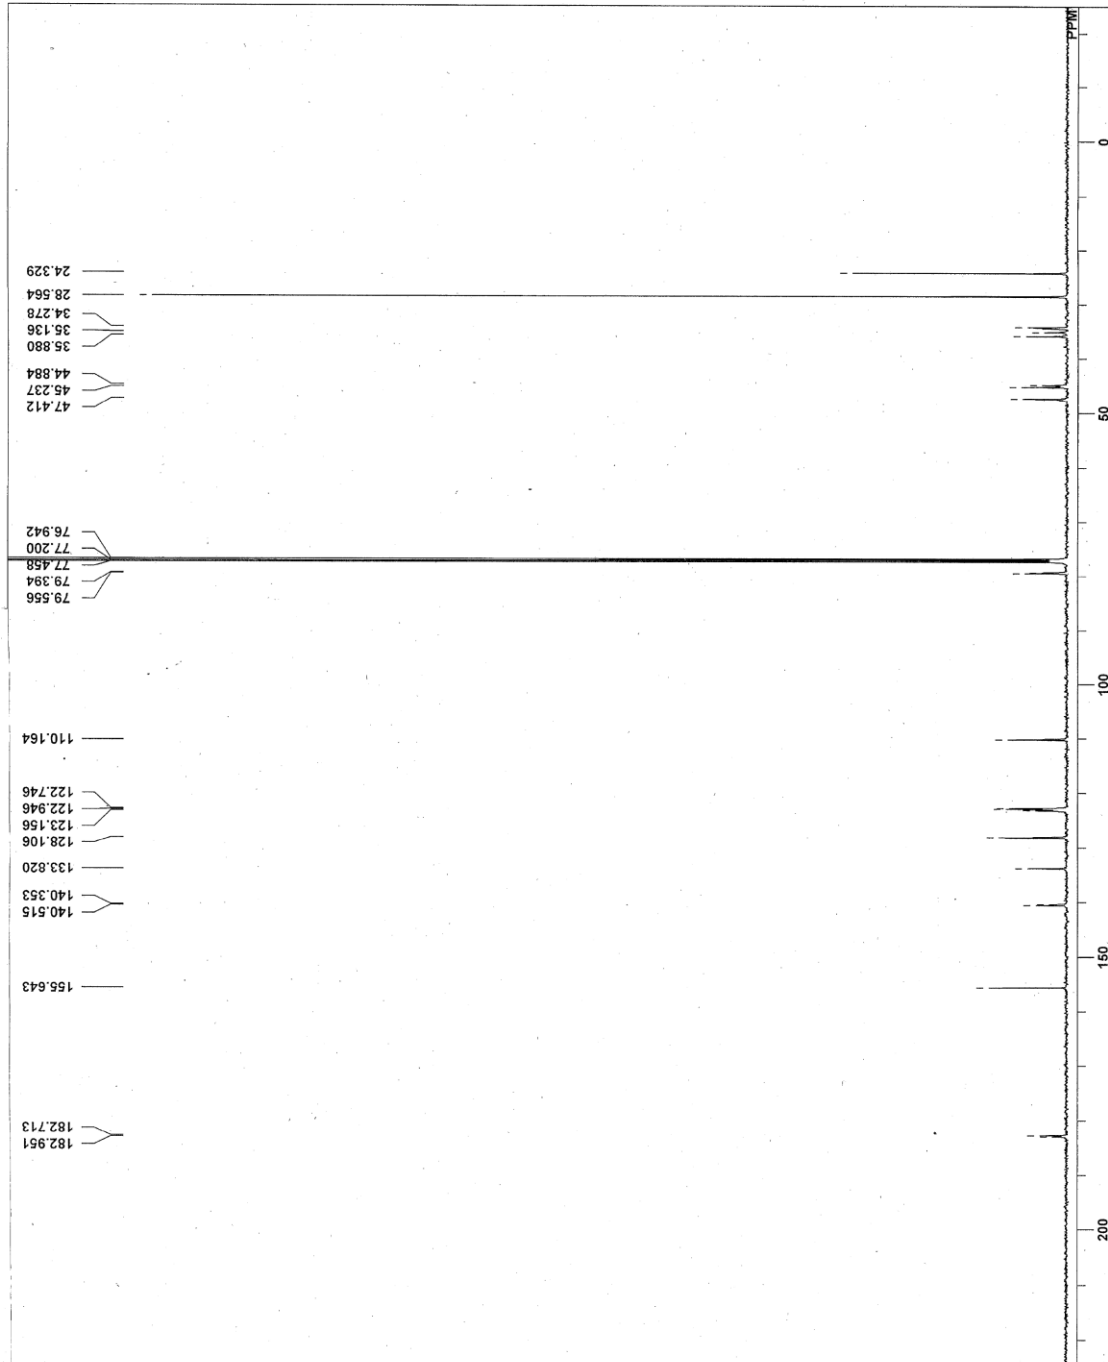



M.MBoc.oxindole.1H-1.als  
 single\_pulse  
 25-02-2009 14:15:52  
 1H  
 single\_pulse.ex2  
 500.16 MHz  
 2.41 KHz  
 6.01 Hz  
 13107  
 7507.39 Hz  
 8  
 1.7459 sec  
 5.0000 sec  
 6.35 usec  
 1H 22.4 c  
 CDCL3  
 0.00 ppm  
 0.12 Hz  
 34

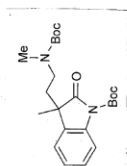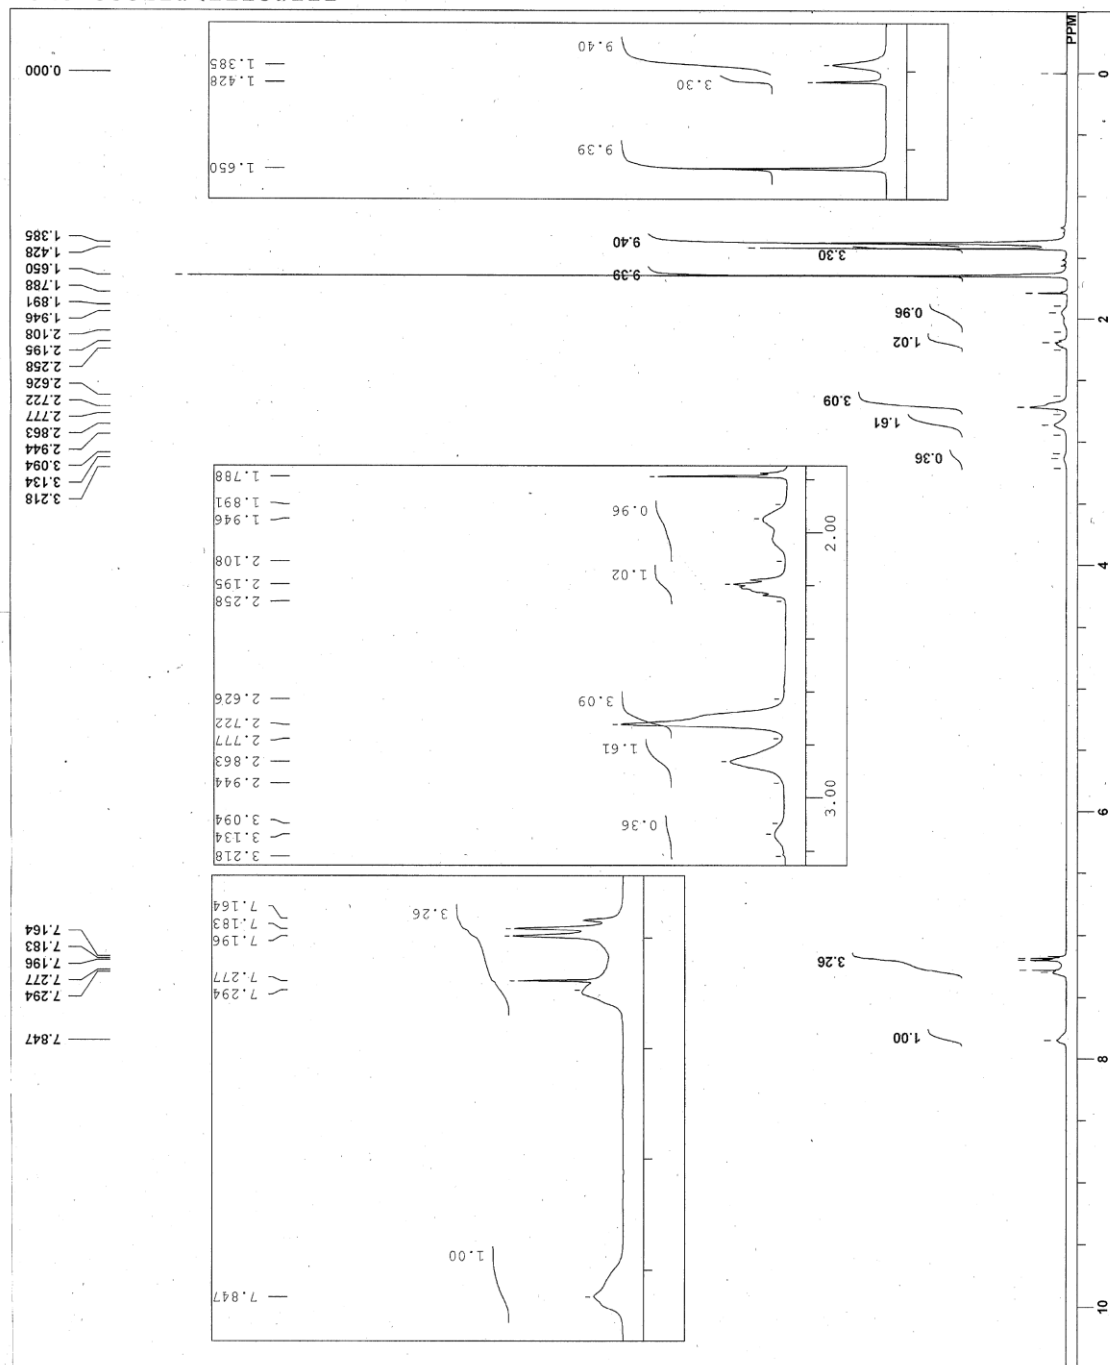

M,NBoc-oxindole.13C-2.als  
 single pulse decoupled gated N  
 07-03-2009 15:53:55  
 13C

DFILE  
 COMINT  
 DATIM  
 OBNUC  
 EXMOD  
 OBFREQ  
 OBSSET  
 OBFIN  
 POINT  
 FREQU  
 SCANS  
 ACQTM  
 PD  
 PW1  
 IRNUC  
 CTEMP  
 SLVNT  
 EXREF  
 BF  
 RGAIN

single\_pulse\_dec  
 125.77 MHz  
 7.87 KHz  
 4.21 Hz  
 26214  
 311446.06 Hz  
 990  
 0.8336 sec  
 2.0000 sec  
 3.50 usec  
 1H  
 23.9  
 CDCL3  
 77.20 ppm  
 1.20 Hz  
 60

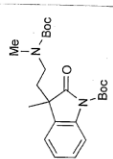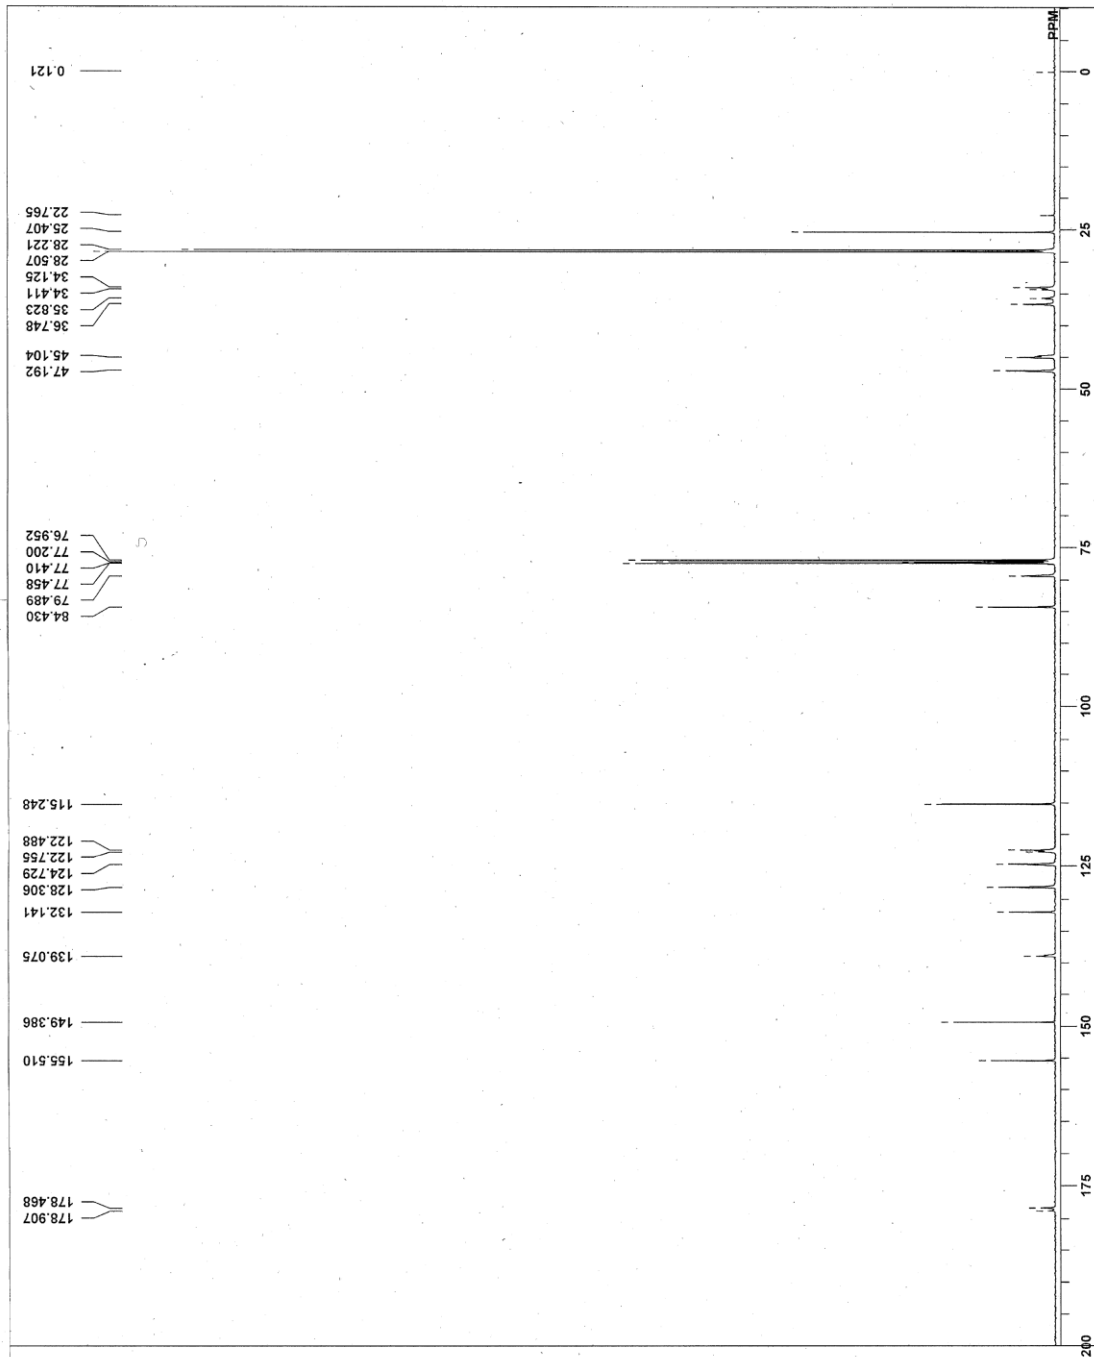

M:py.Me.Me.1H-1.als  
 single\_pulse  
 20-02-2009 23:28:04

DFILE  
 COMMENT  
 DATIM  
 OBNUC  
 EXMOD  
 OBFREQ  
 OBSSET  
 OBFIN  
 POINT  
 FREQU  
 SCANS  
 ACQTIM  
 PD  
 PW1  
 IRNUC  
 CTEMP  
 SLVNT  
 EXREF  
 BF  
 RGAIN

single\_pulse.ex2  
 500.16 MHz  
 2.41 KHz  
 6.01 Hz  
 13107  
 7507.39 Hz  
 8  
 1.7459 sec  
 5.0000 sec  
 6.35 usec  
 1H  
 21.0 c  
 CDCl3  
 0.00 ppm  
 0.12 Hz  
 34

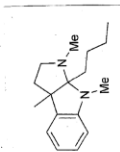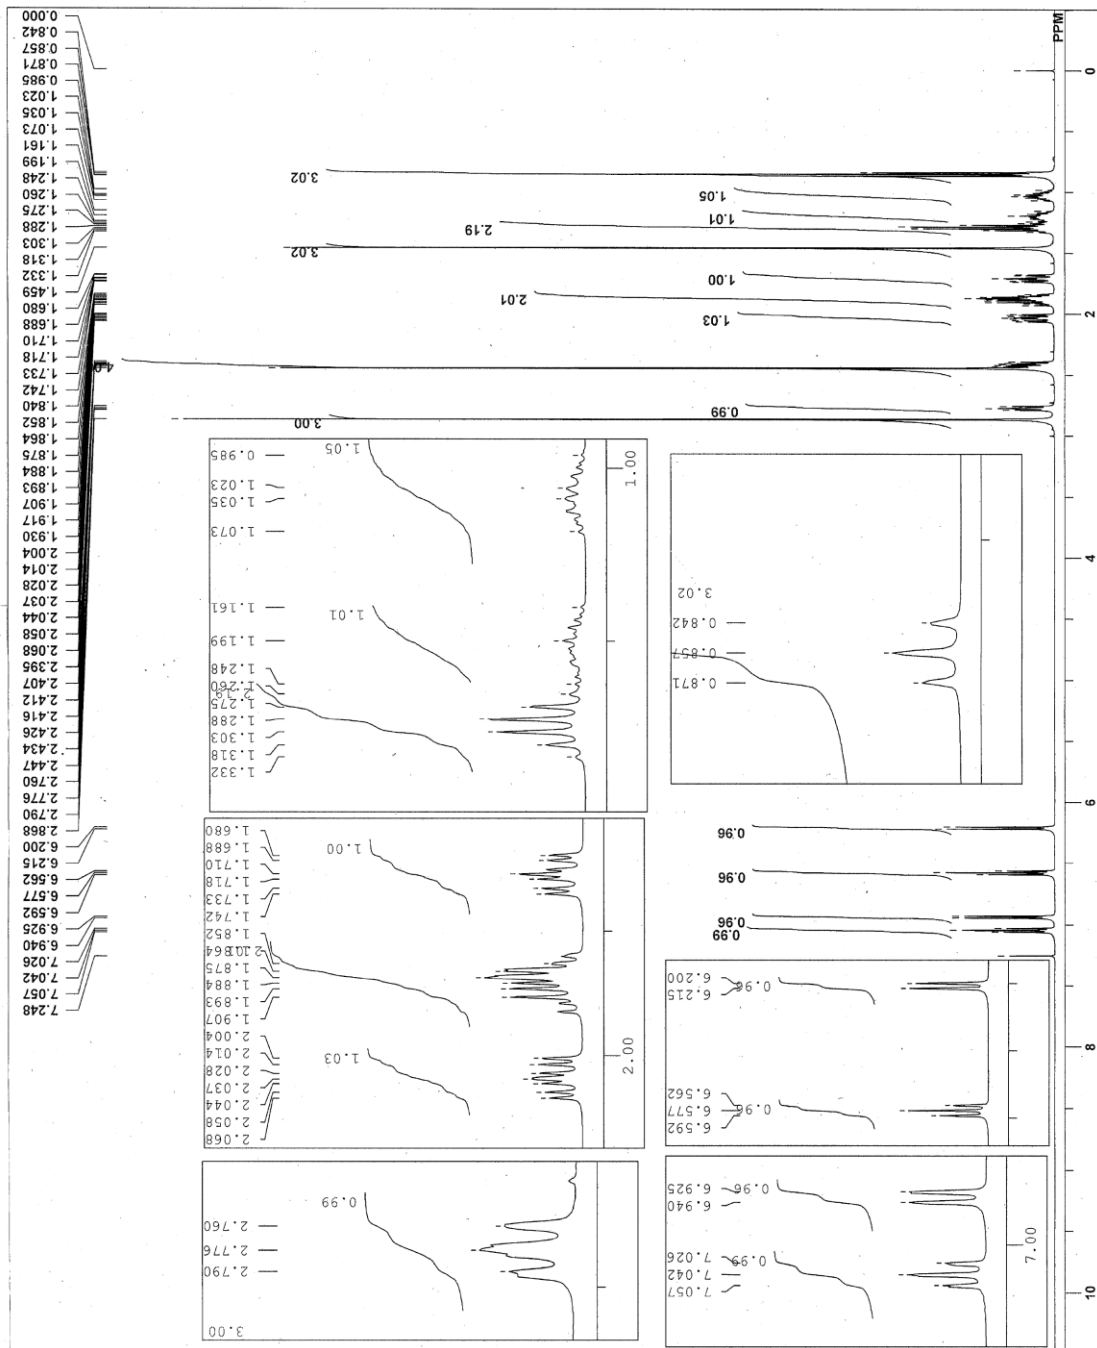

DFILE M.py.Me.Me.13C-1.als  
COMNT single pulse decoupled gated N  
DATIM 21-02-2009 00:16:04  
13C  
EXMOD single\_pulse\_dec  
OBNUC 125.77 MHz  
OBFRQ 7.87 KHz  
OBSFQ 4.21 Hz  
OBFIN 26214  
POINT 31446.06 Hz  
FREQU 0.8336 sec  
SCANS 2.0000 sec  
ACQTM 3.50 usec  
PD 1H  
IRNUC 21.5 c  
CTEMP CDCL3  
SIVNT 77.20 ppm  
EXREF BF  
BF 0.12 Hz  
RGAIN 60

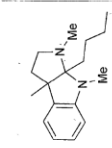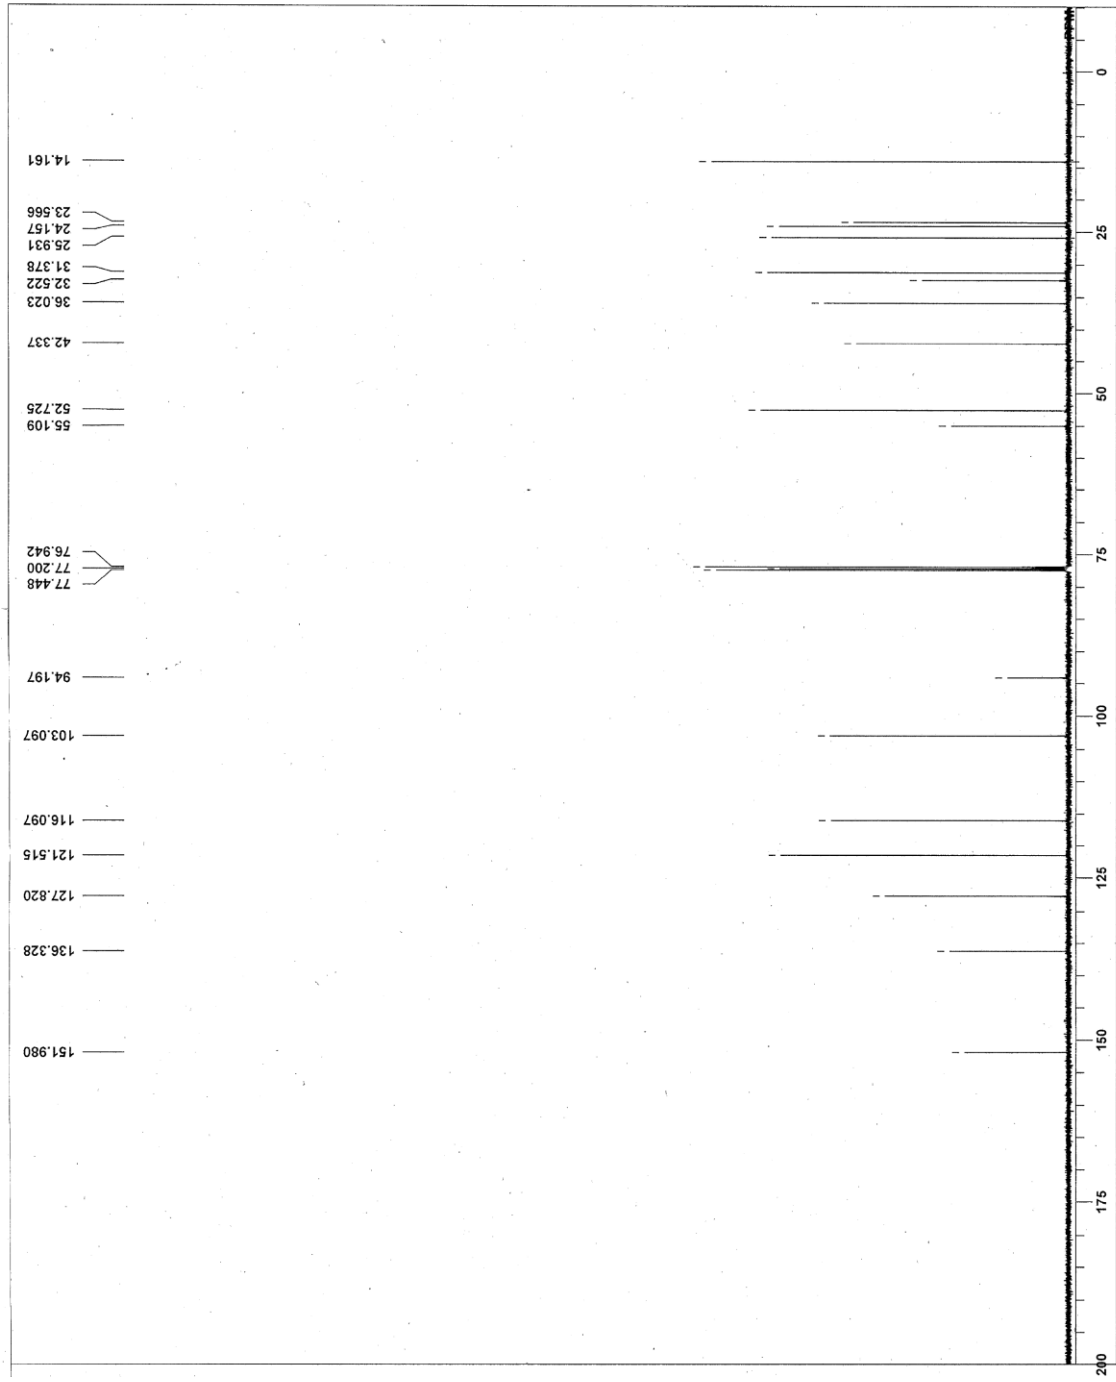

M-py.Me.Me.cosy-1.als  
gradient absolute value cosy  
21-02-2009 00:23:28  
cosy\_dg.ex2  
1H

DFILE  
COMINT  
DATIM  
EXMOD  
OBNUC  
OBFREQ  
OBFSET  
OBFIN  
POINT  
FREQU  
CLPNT  
TODAT  
CLFRQ  
SCANS  
ACQTM  
PD  
PWI  
FW2  
FW3  
F11  
F12  
F13  
F14  
F15  
F16  
F17  
F18  
F19  
F20  
F21  
F22  
F23  
F24  
F25  
F26  
F27  
F28  
F29  
F30  
F31  
F32  
F33  
F34  
F35  
F36  
F37  
F38  
F39  
F40  
F41  
F42  
F43  
F44  
F45  
F46  
F47  
F48  
F49  
F50  
F51  
F52  
F53  
F54  
F55  
F56  
F57  
F58  
F59  
F60  
F61  
F62  
F63  
F64  
F65  
F66  
F67  
F68  
F69  
F70  
F71  
F72  
F73  
F74  
F75  
F76  
F77  
F78  
F79  
F80  
F81  
F82  
F83  
F84  
F85  
F86  
F87  
F88  
F89  
F90  
F91  
F92  
F93  
F94  
F95  
F96  
F97  
F98  
F99  
F100

500.16 MHz  
2.41 KHz  
6.01 Hz  
1024  
7507.51 Hz  
256  
7503.00 Hz  
1  
0.1384 sec  
1.5000 sec  
12.70 usec  
0.00 usec  
0.00 usec  
0.0000 msec  
0.0000 msec  
0.0000 msec  
1H 21.2 c  
CDCl3  
0.00 ppm  
0.00  
50

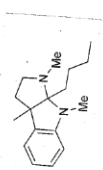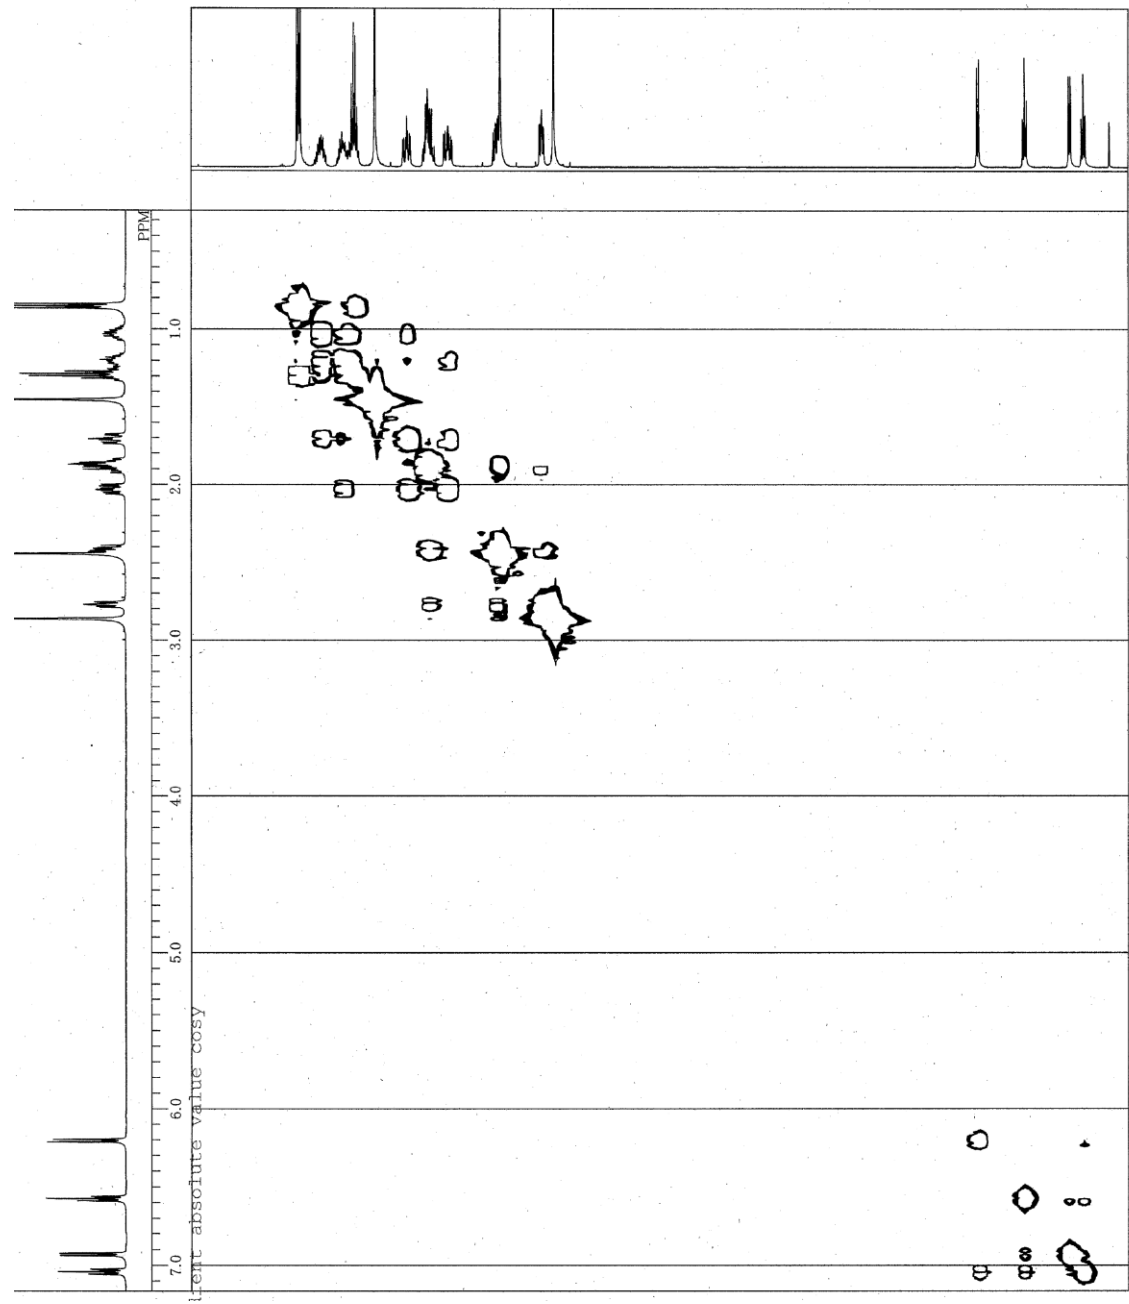

M-py.Me.Me.hmqc-1.als  
 gradient enhanced HMQC w/  
 21-02-2009 01:01:22  
 hmqc\_bg.ex2

DEFILE  
 COMNT  
 DATHM  
 EXMOD  
 OBNUC  
 OBSRQ  
 OBSRT  
 OBFIN  
 PPRNU  
 PPRNU  
 CUPAT  
 TODAT  
 CLEFR  
 SCANS  
 ACQTM  
 PD  
 PW1  
 PW2  
 PW3  
 P11  
 P12  
 P13  
 IRNUC  
 CTEMP  
 SLVNT  
 EXREF  
 CLEFR  
 RGAIN

500.16 MHz  
 2.41 KHz  
 601 Hz  
 7592.67 Hz  
 255  
 21385.80 Hz  
 0.1091 sec  
 1.5000 sec  
 12.70 usec  
 0.00 usec  
 0.00 usec  
 0.0000 msec  
 0.0000 msec  
 0.0000 msec  
 13C 21.1 C  
 CDCl3  
 0.00 ppm  
 77.20  
 50

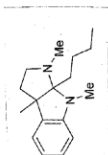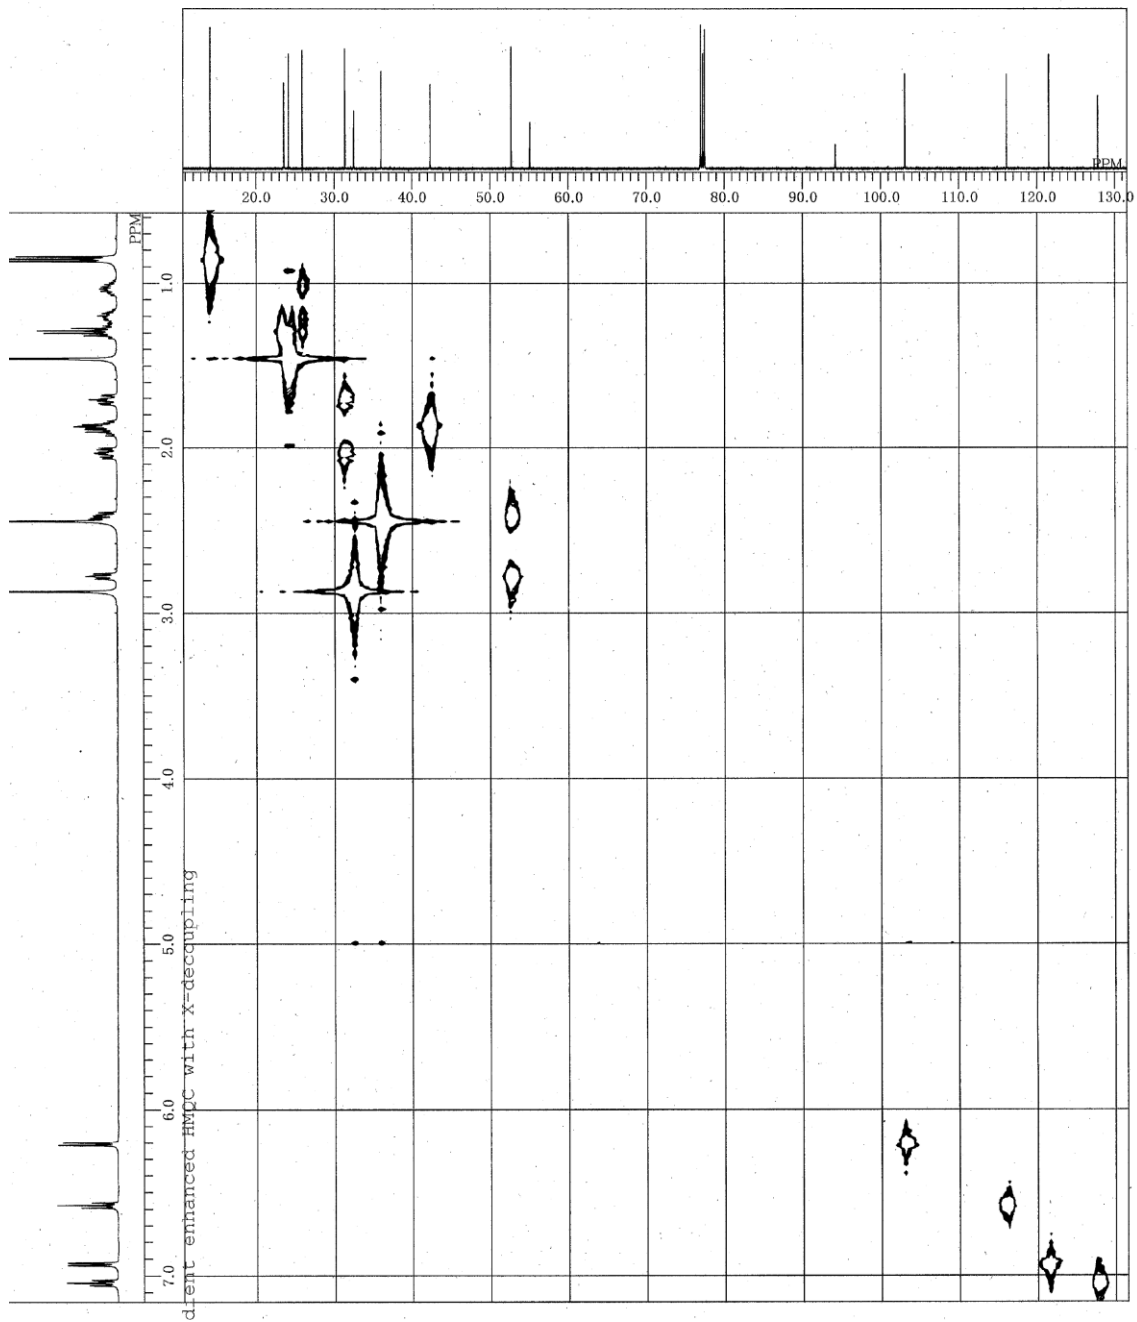

gradient enhanced HMQC with X-decoupling

M.pyr.Me.Me.hmbc-1.dfs  
 gradient enhanced HMBc  
 21-07-2009 00:34:12  
 hmbc\_dg.exe  
 IH  
 500.16 MHz  
 2.41 KHz  
 6.01 Hz  
 1638  
 7505.97 Hz  
 259  
 31446.54 Hz  
 4  
 0.2182 sec  
 1.5000 sec  
 12.70 usec  
 0.00 usec  
 0.00 usec  
 0.0000 msec  
 0.0000 msec  
 0.0000 msec  
 13C 21.0 c  
 CDCl3  
 0.00 ppm  
 77.20  
 50

DFILE  
 COMNT  
 EXAMN  
 OPNLC  
 OPNLC  
 OPNLC  
 OPNLC  
 POINT  
 POINT  
 FREQU  
 CLPNT  
 TODAT  
 CLFRQ  
 SCANS  
 ACQTM  
 PD  
 PW1  
 PW2  
 PW3  
 P11  
 P12  
 P13  
 IRNUC  
 CTEMP  
 SLVNT  
 EXREF  
 CLEXR  
 RGAIN

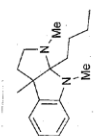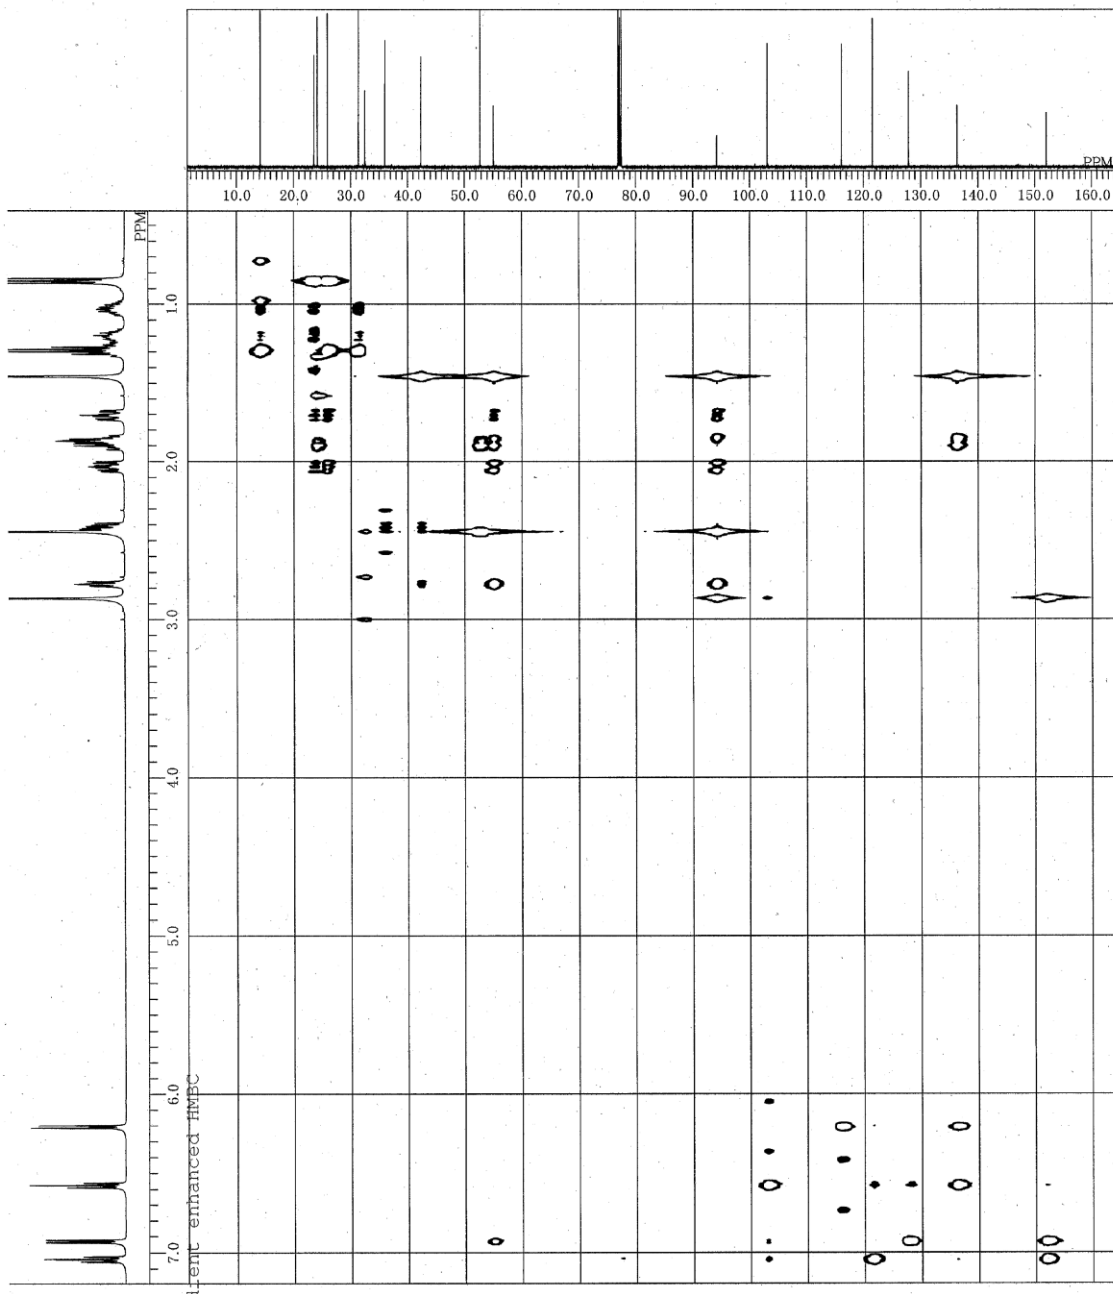

DFILE M.py.Me.Boc.Ltemp-1.a1s  
 COMNT single\_pulse  
 DATIM 28-02-2009 15:23:13  
 1H  
 EXMOD single\_pulse.ex2  
 EXNO 500.16 MHz  
 OBSFRQ 2.41 KHz  
 OBSF 6.01 Hz  
 POINT 13107  
 FREQU 7507.39 Hz  
 SCANS 8  
 ACQTM 1.7459 sec  
 PD 5.0000 sec  
 PW1 6.35 usec  
 IRNUC 1H  
 CTEMP 100.0 c  
 SLVNT C6D5CD3  
 EXREF 7.09 ppm  
 BF 120 Hz  
 RGAIN 32

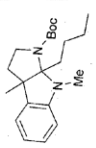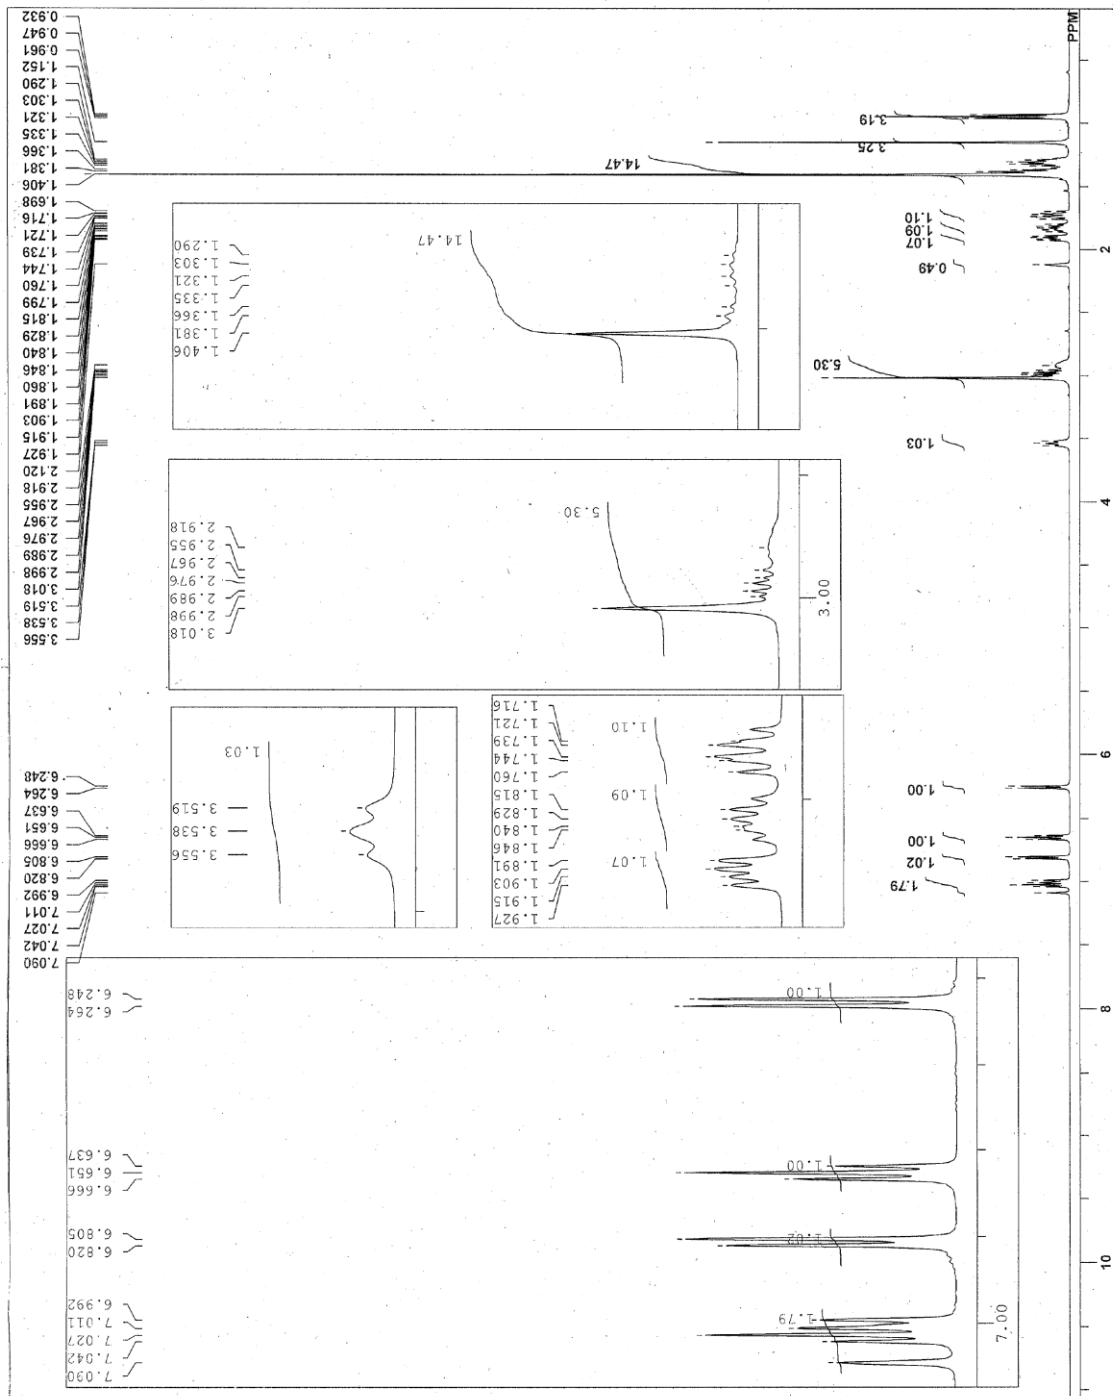



M.py.Me.Boc.13C.Ltemp-1.als  
single pulse decoupled gated N  
28-02-2009 18:11:47  
13C  
single\_pulse\_dec

DFILE  
COMINT  
DATIM  
OBNUC  
EXMOD  
OBFRQ  
OBSET  
OBFIN  
POINT  
FREQU  
SCANS  
ACQTM  
PD  
PW1  
IRNUC  
CTEMP  
SLVNT  
EXREF  
BF  
RGAIN

125.77 MHz  
7.87 KHz  
4.21 Hz  
26214  
314446.06 Hz  
1000  
0.8336 sec  
2.0000 sec  
3.50 usec  
1H  
100.0 c  
C6D5CD3  
20.40 ppm  
1.20 Hz  
60

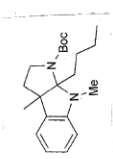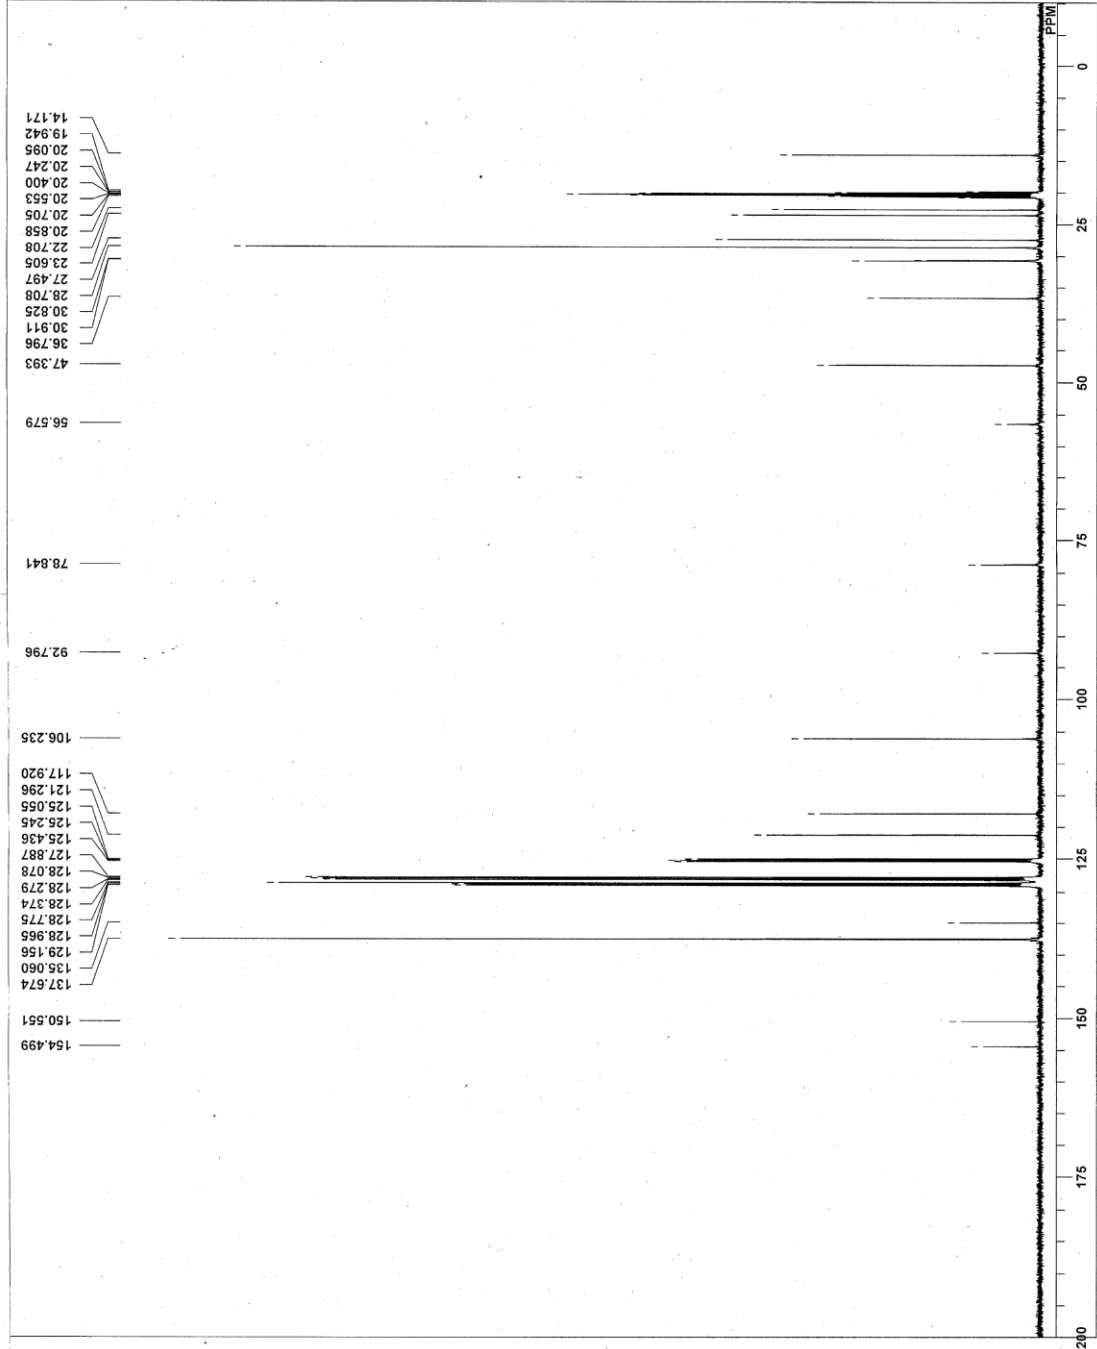

DFILE preNagishi,1H-1a1s  
 COMNT single\_pulse  
 DATIM 03-03-2009 12:12:15  
 OBNUC 1H  
 EXMOD single\_pulse.ex2  
 OBFRQ 500.16 MHz  
 OBSET 2.41 KHz  
 ORFIN 6.01 Hz  
 POINT 13107  
 FREQU 7507.39 Hz  
 SCANS 8  
 ACQTIM 1.7459 sec  
 PD 5.0000 sec  
 PM1 6.35 usec  
 IRNUC 1H 21.5 c  
 CTEMP CDCL3  
 SLVNT 0.00 ppm  
 EXREF 1.20 Hz  
 BF 34  
 RGAIN

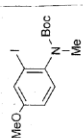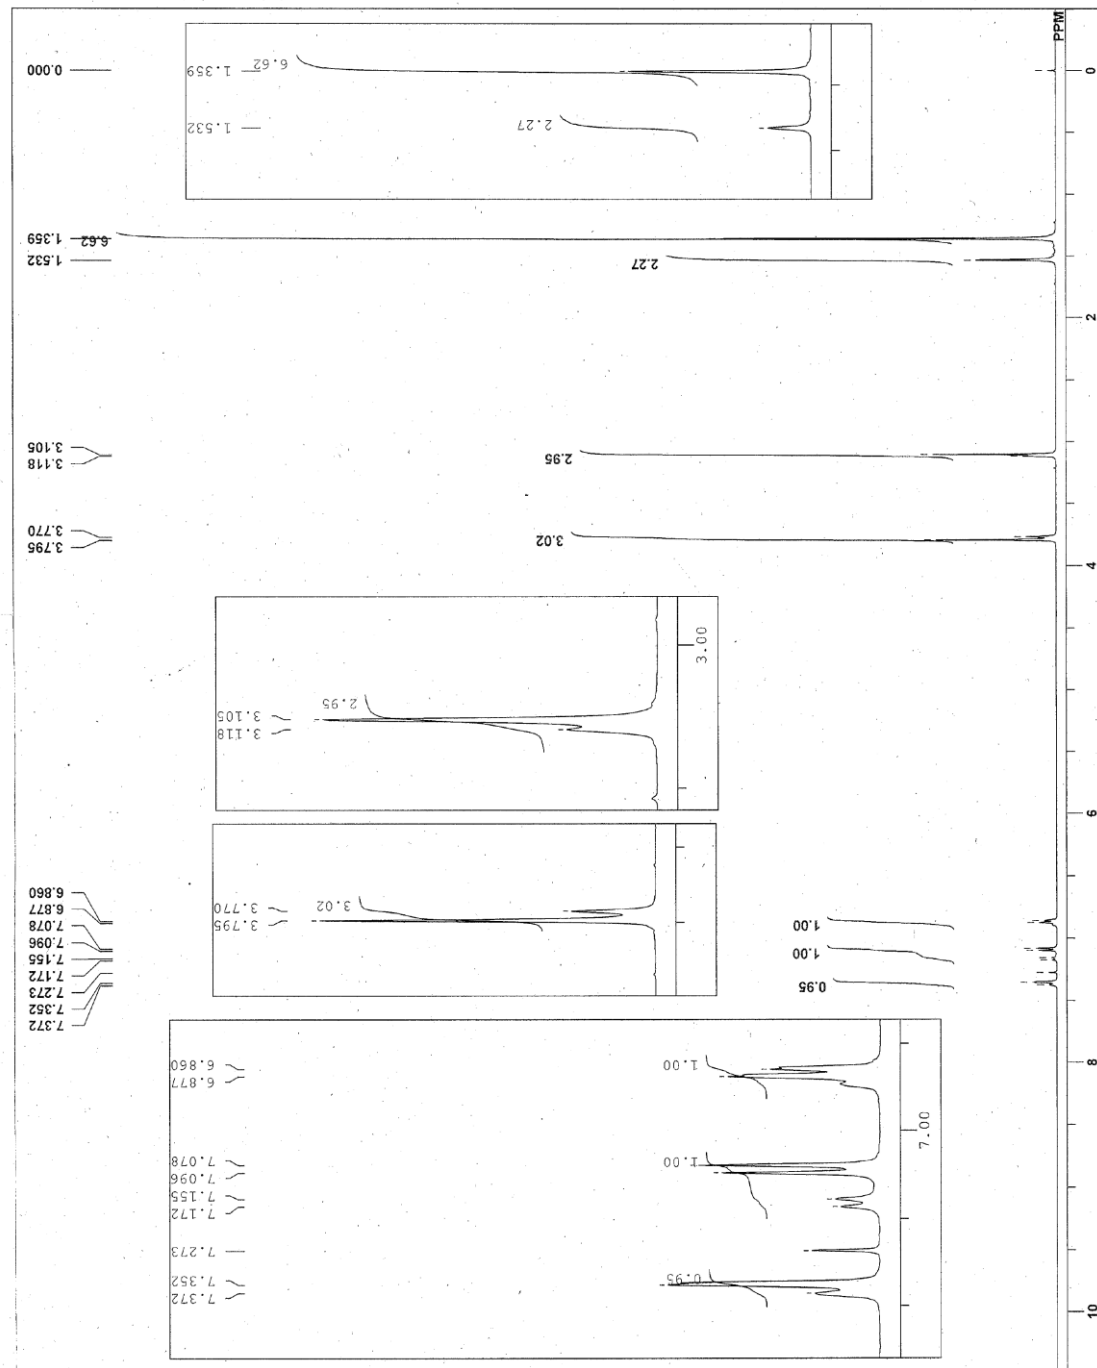

DEFILE preNegishi1.13C- 1,alls  
COMINT single pulse decoupled gated N  
DATIM 03-03-2009 13:00:14  
13C  
EXMOD single\_pulse\_dec  
OBSFREQ 125.77 MHz  
OBSSET 7.87 KHz  
OBSF1 4.21 Hz  
POINT 26214  
FREQU 31446.06 Hz  
SCANS 1000  
ACQTM 0.8336 sec  
PD 2.0000 sec  
PW1 3.50 usec  
IRNUC 1H 21.9 c  
CTEMP CDCL3  
SLVNT 77.20 ppm  
EXREF 1.20 Hz  
BF 60  
RGAIN

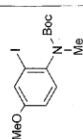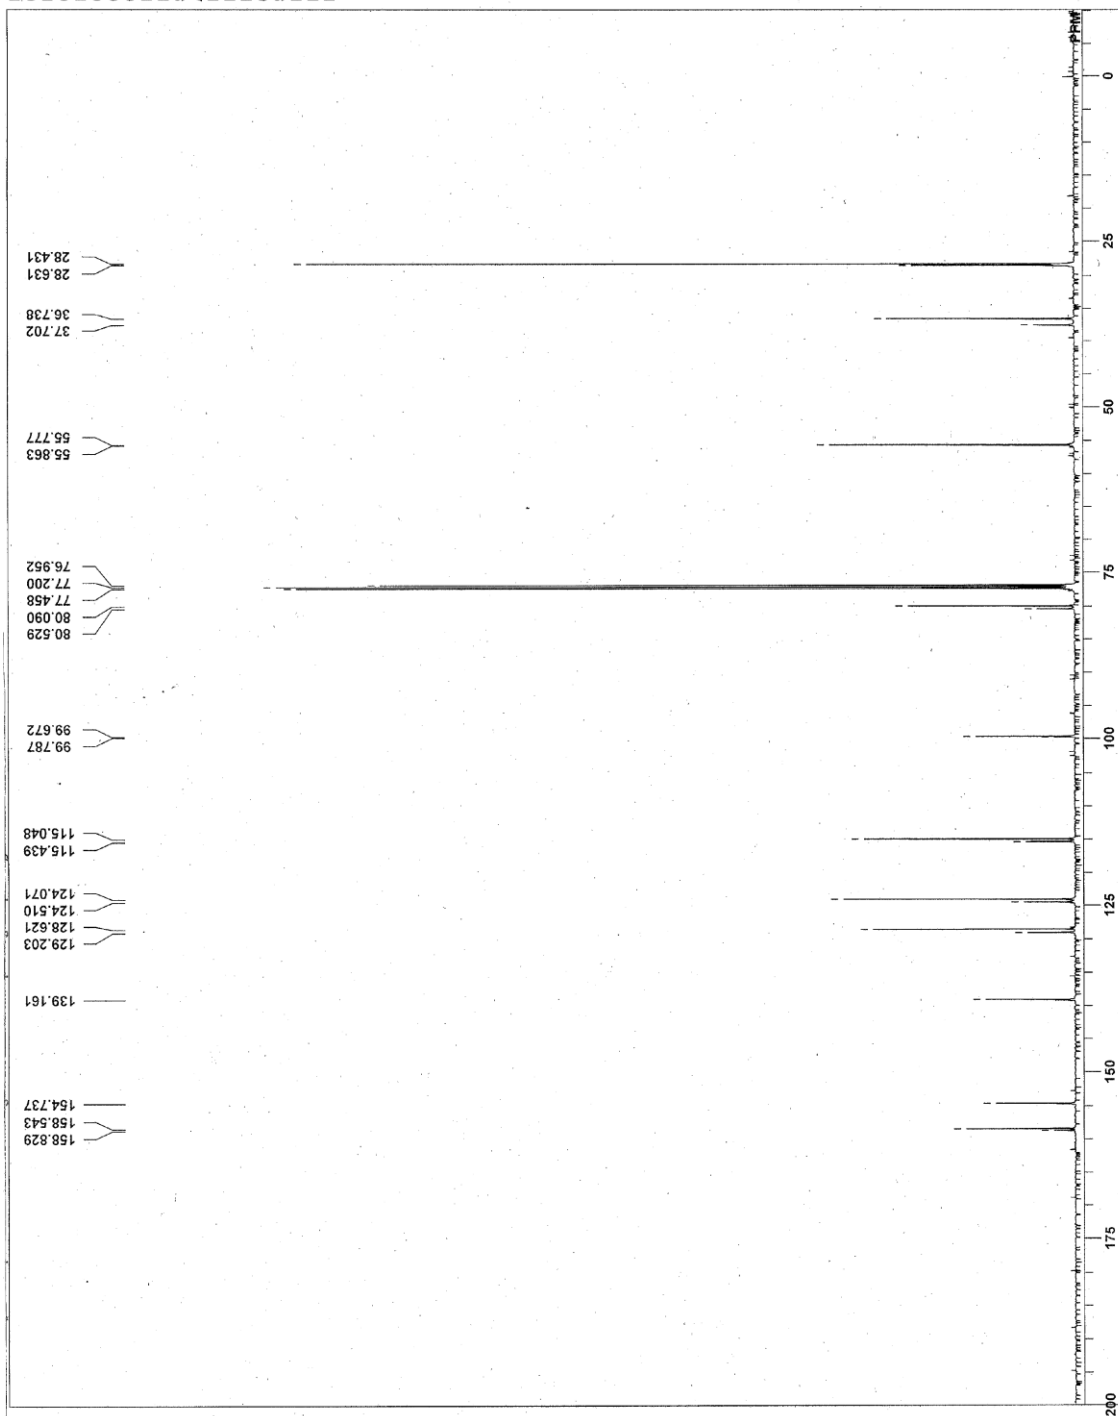

DFILE 0367.1H-1.a1s  
 COMNT single\_pulse  
 DATIM 15-12-2008 20:42:42  
 OBNUC 1H  
 EXMOD single\_pulse.ex2  
 EXFRQ 500.16 MHz  
 OBSFR 2.41 KHz  
 OBSF1 6.01 Hz  
 POINT 13107  
 FREQU 7507.39 Hz  
 SCANS 8  
 ACQTM 1.7459 sec  
 PD 5.0000 sec  
 PW1 6.05 usec  
 IRNUC 1H  
 CTEMP 24.0 c  
 SLVNT CDCL3  
 EXREF 0.00 ppm  
 BF 0.12 Hz  
 RGAIN 38

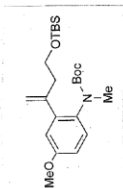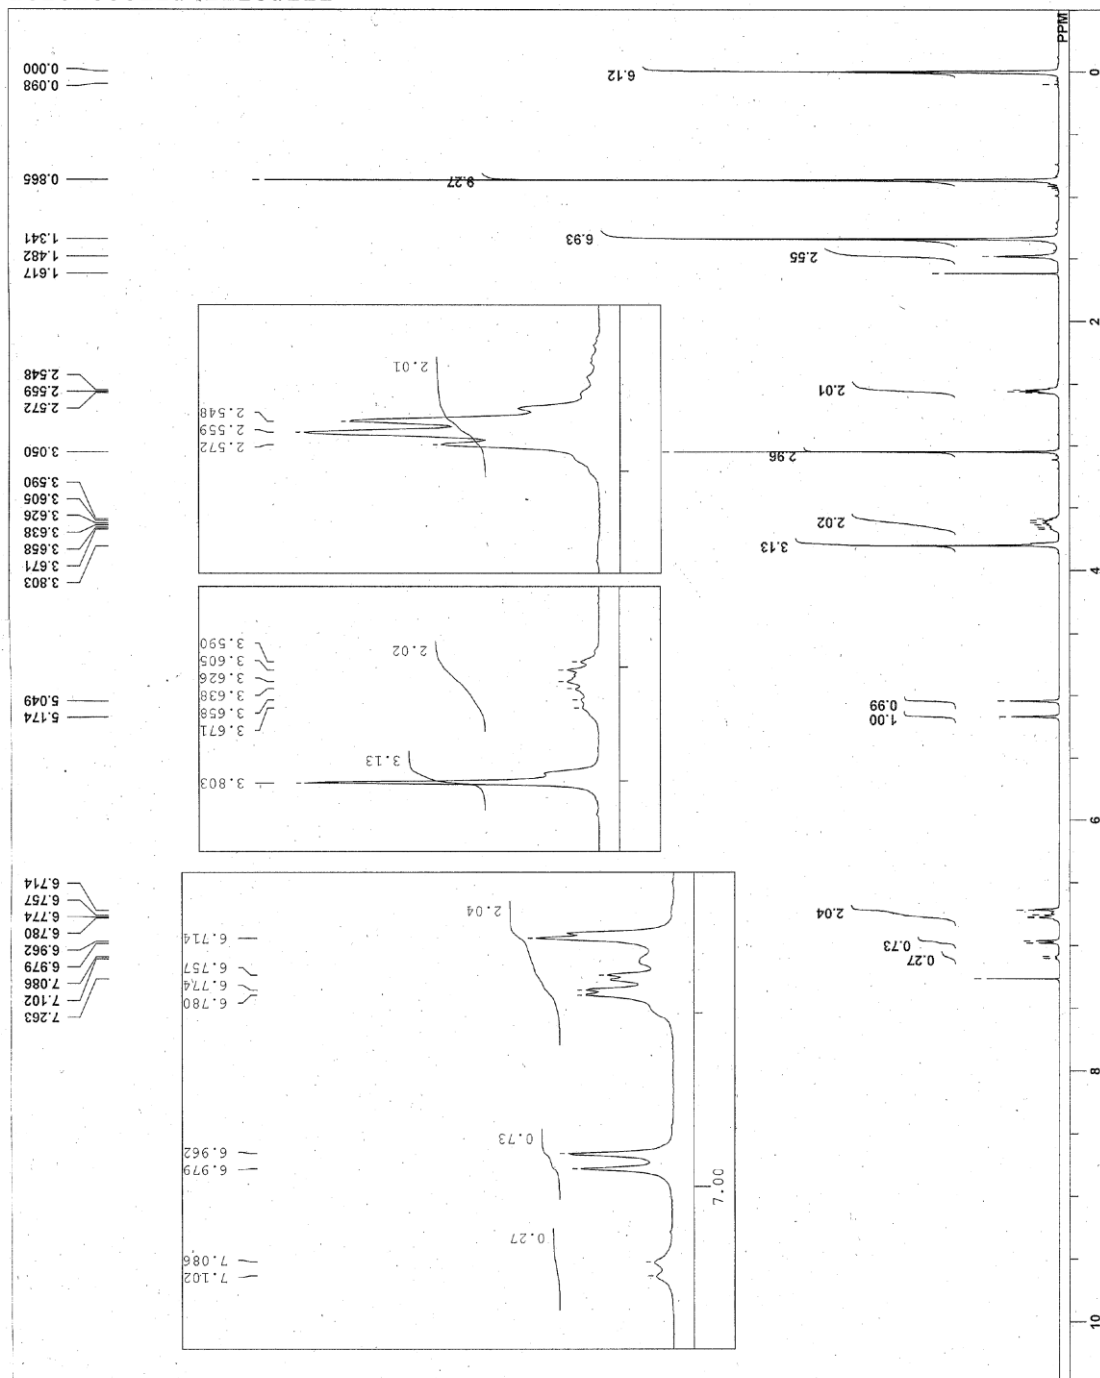

DFILE 0367.13C-1.a1s  
COMINT single pulse decoupled gated N  
DATIM 15-12-2008 21:30:40  
OBNUC 13C  
EXMOD single pulse dec  
OBFRQ 125.77 MHz  
OBSET 7.87 KHz  
OBFIN 4.21 Hz  
POINT 26214  
FREQU 31446.06 Hz  
SCANS 1000  
ACQTM 0.8336 sec  
PD 2.0000 sec  
PW1 3.83 usec  
IRNUC 1H  
CTEMP 24.4 c  
SLVNT CDCl3  
EXREF 77.20 ppm  
BF 0.42 Hz  
RGAIN 60

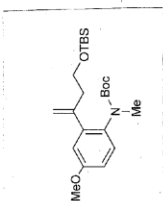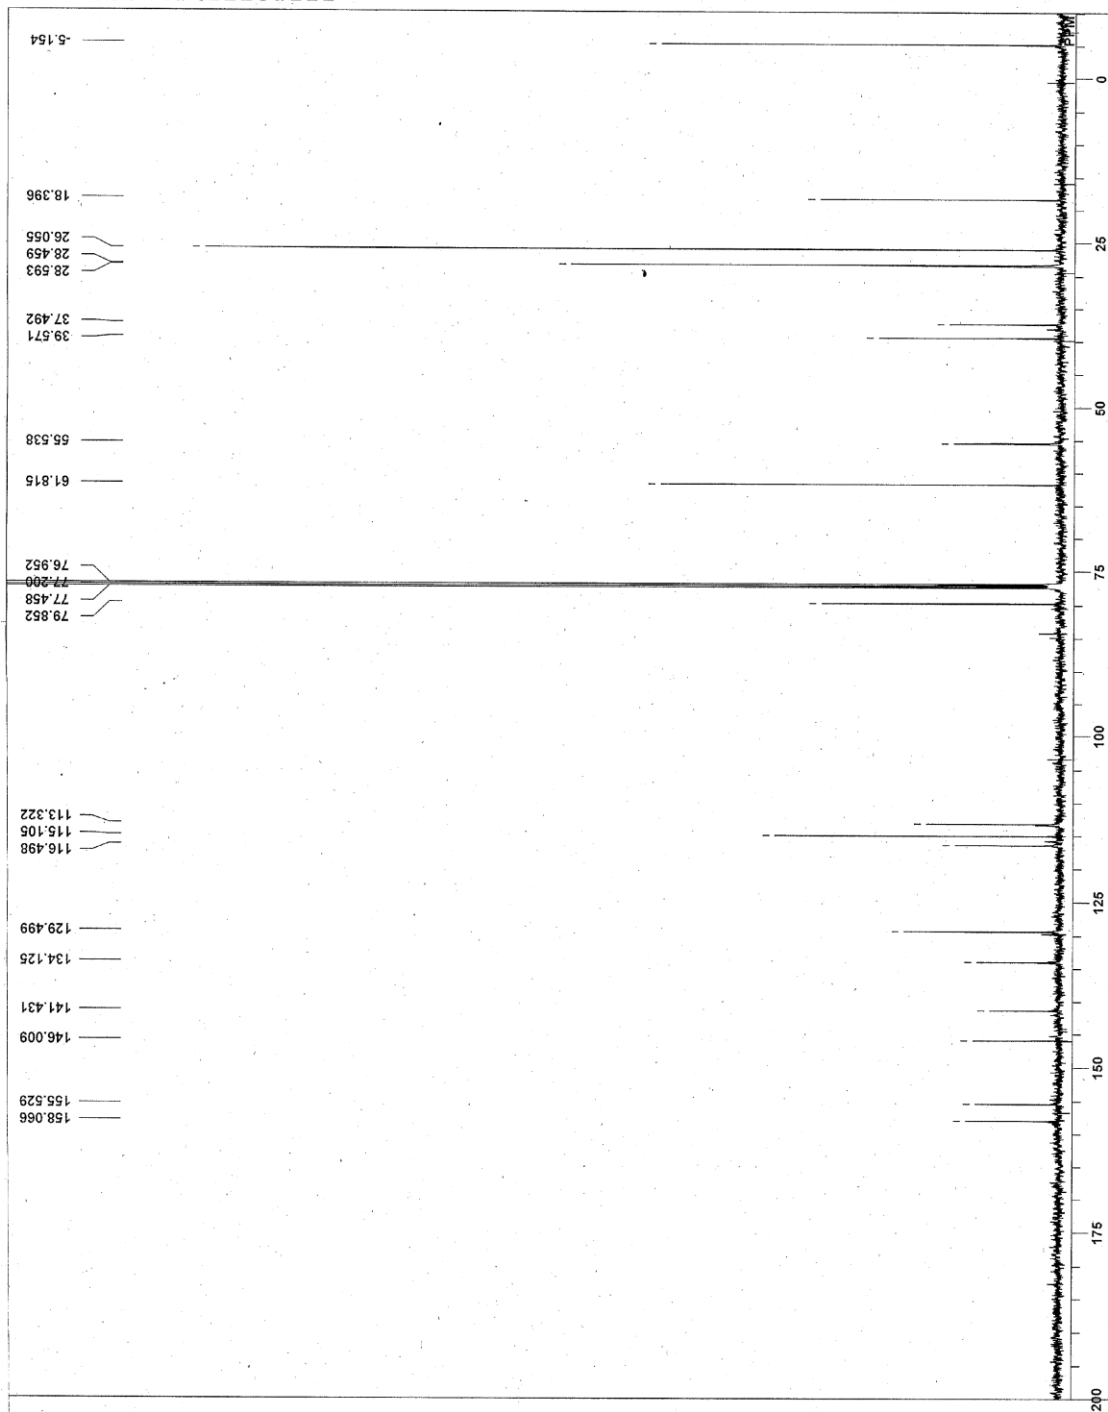













0003-dtata-c-1.xls  
single pulse decoupled gated N

DFILE  
COMINT  
DATIM 16-11-2007 02:13:07  
OBNUC 13C  
EXMOD single\_pulse\_dec  
OBFRQ 125.77 MHz  
OBSET 7.87 KHz  
OBSF 4.21 Hz  
POINT 26214  
FREQU 31446.06 Hz  
SCANS 256  
ACQTM 0.8336 sec  
PD 2.0000 sec  
PW1 3.83 usec  
IRNUC 1H 29.3 c  
CTEMP CDCL3  
SIVNT 77.20 ppm  
EXREF 0.00 Hz  
BF 60  
RGAIN

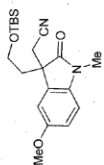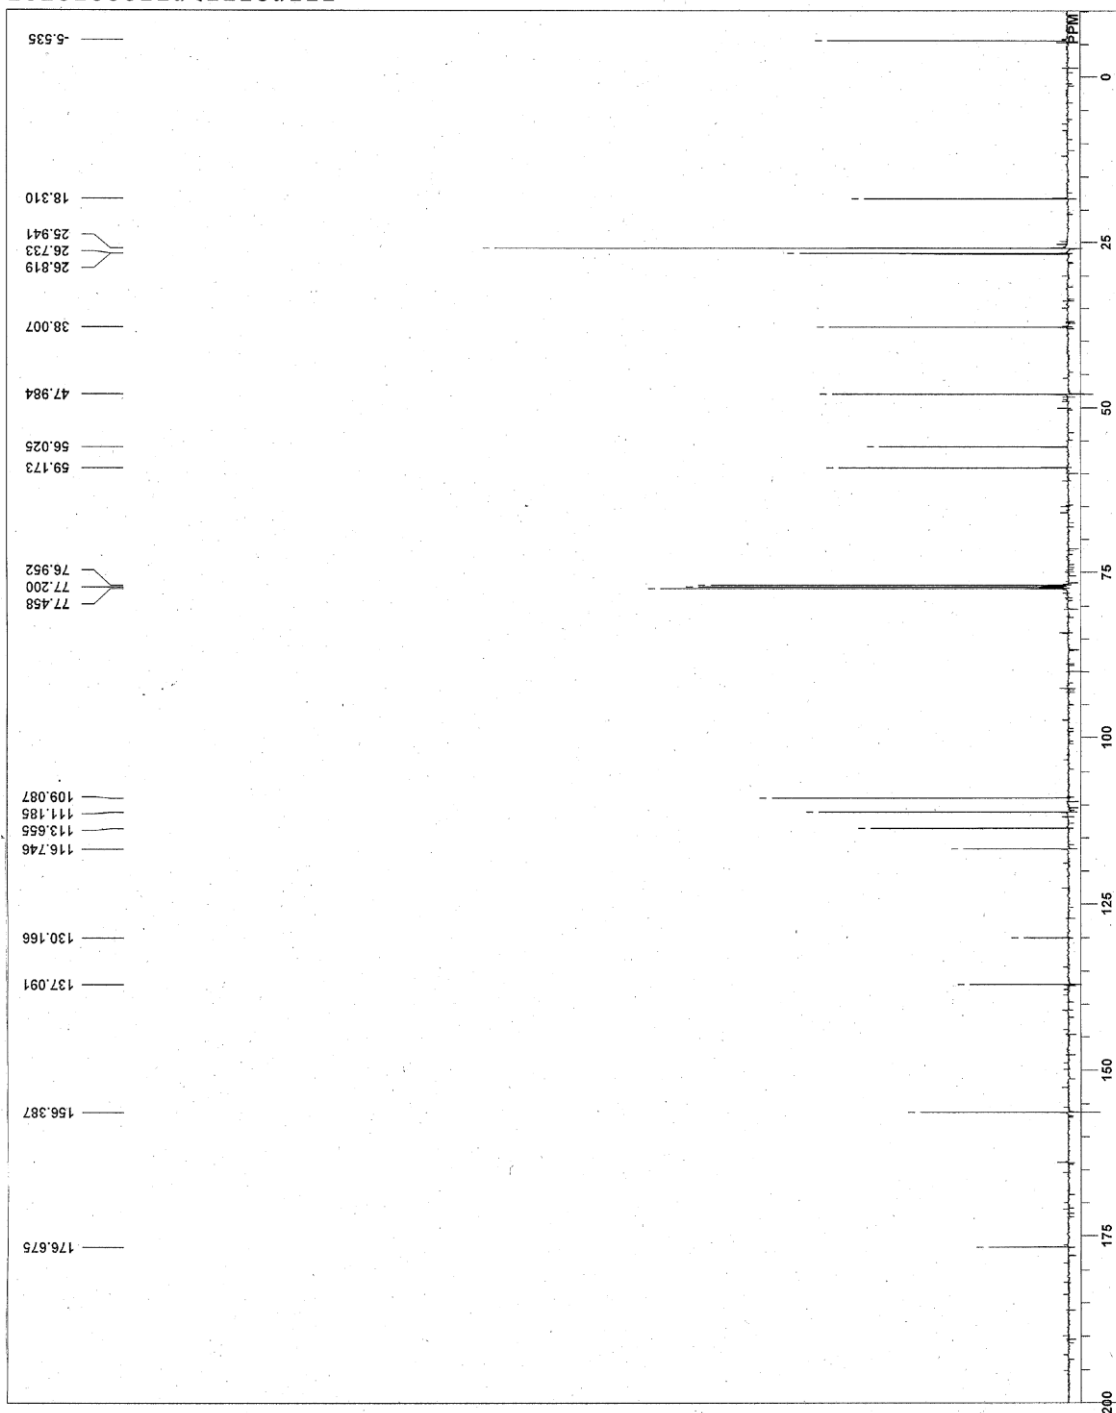

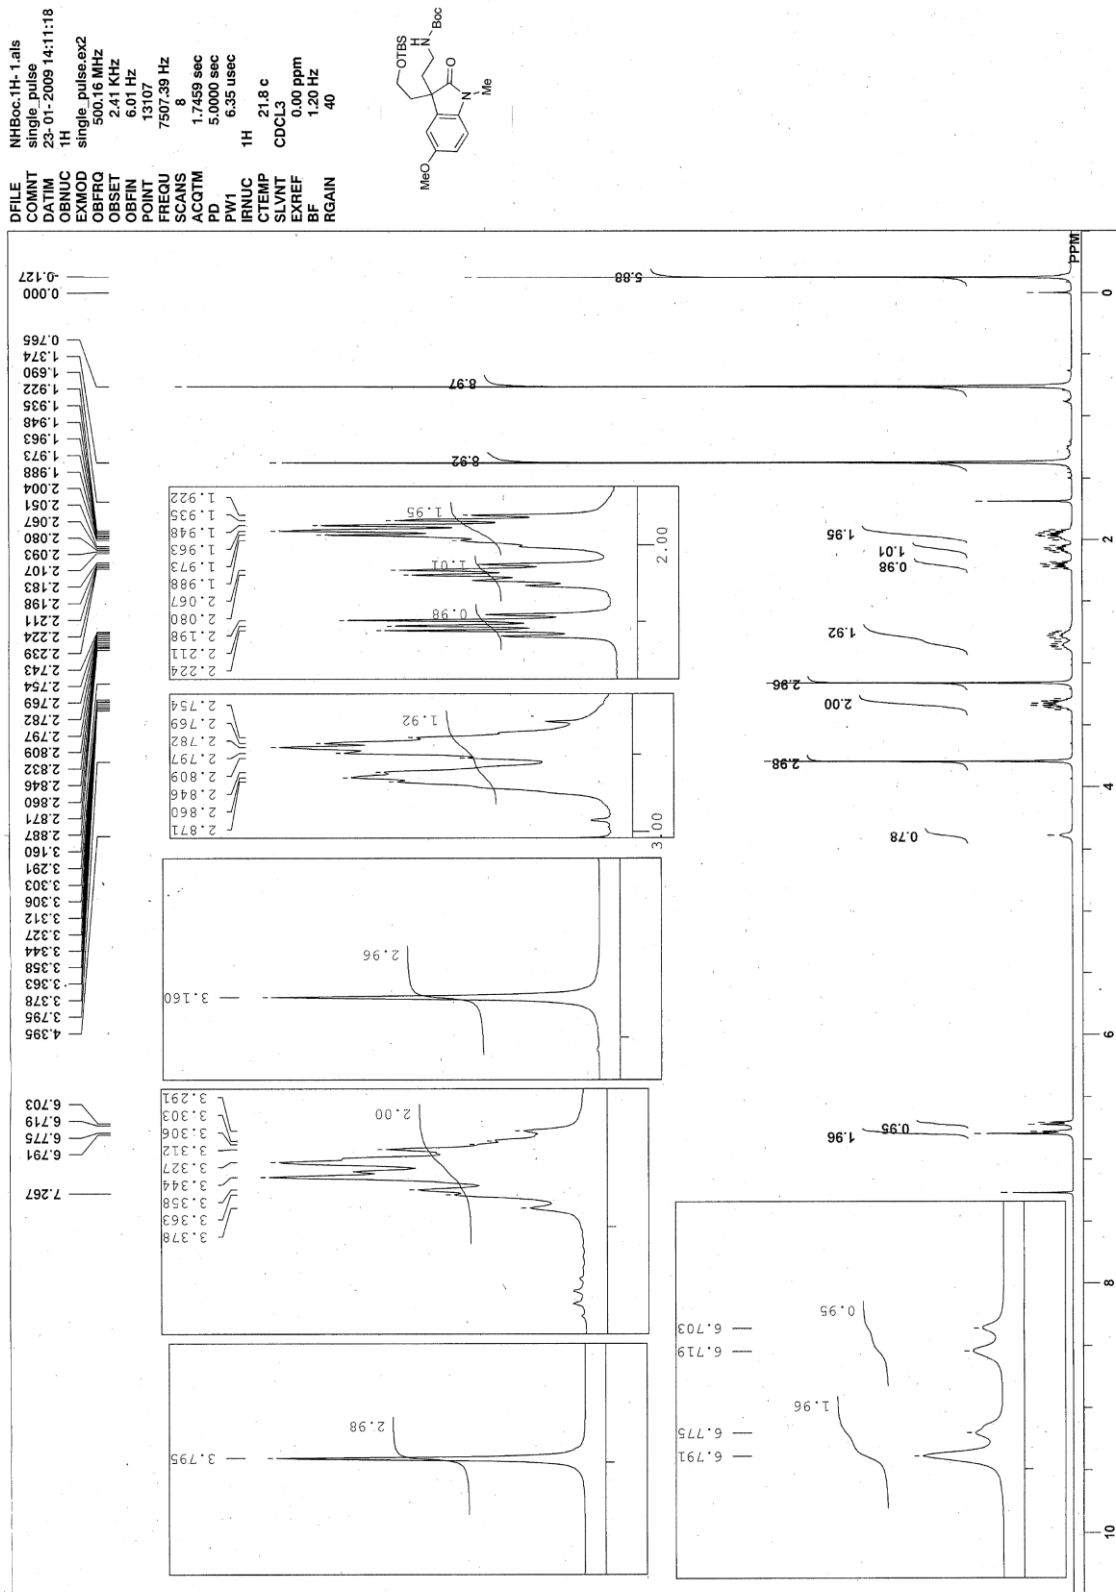

DFILE NHBoc13C-.als  
COMNT single pulse decoupled gated N  
DATIM 27-02-2009 22:54:25  
OBNUC 13C

EXMOD single\_pulse\_dec  
OBFREQ 125.77 MHz  
OBFSZ 7.87 KHz  
OBFIN 4.21 Hz  
POINT 26214

FREQU 31446.06 Hz  
SCANS 1000  
ACQTM 0.8336 sec  
PD 2.0000 sec  
PW1 3.50 usec

IRNUC 1H 22.7 c  
CTEMP CDCL3  
SLVNT 77.20 ppm  
EXREF 1.20 Hz  
BF 56  
RGAIN

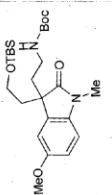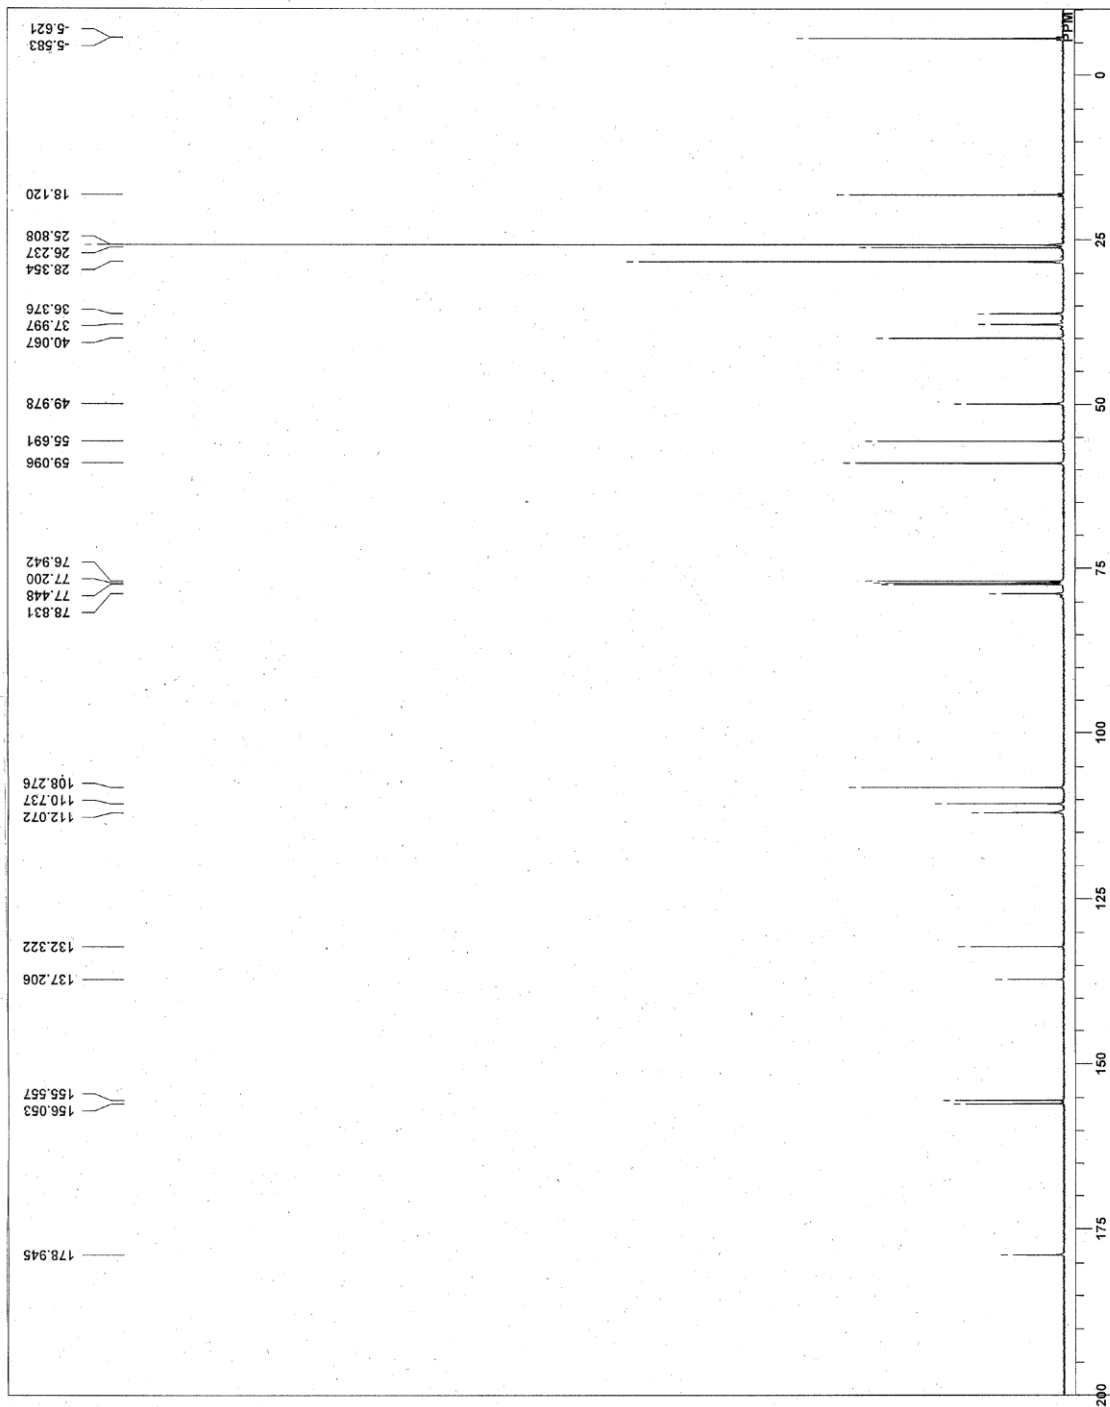



py,Me,Boc,toluene,100,13C-1al  
 single pulse decoupled gated N  
 05-03-2009 00:50:30

DFILE  
 COMNT  
 DATIM  
 OBNUC  
 EXMOD  
 OBFRO  
 OBSEI  
 OBFIN  
 POINT  
 FREQU  
 SCANS  
 ACQTM  
 PD  
 PW1  
 IRNUC  
 CTEMP  
 SLVNT  
 EXREF  
 BF  
 RGAIN

13C  
 single pulse\_dec  
 125.77 MHz  
 7.87 KHz  
 4.21 Hz  
 26214  
 31446.06 Hz  
 1200  
 0.8336 sec  
 2.0000 sec  
 3.50 usec  
 1H  
 90.0 c  
 C6D5CD3  
 20.40 ppm  
 1.20 Hz  
 58

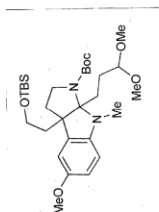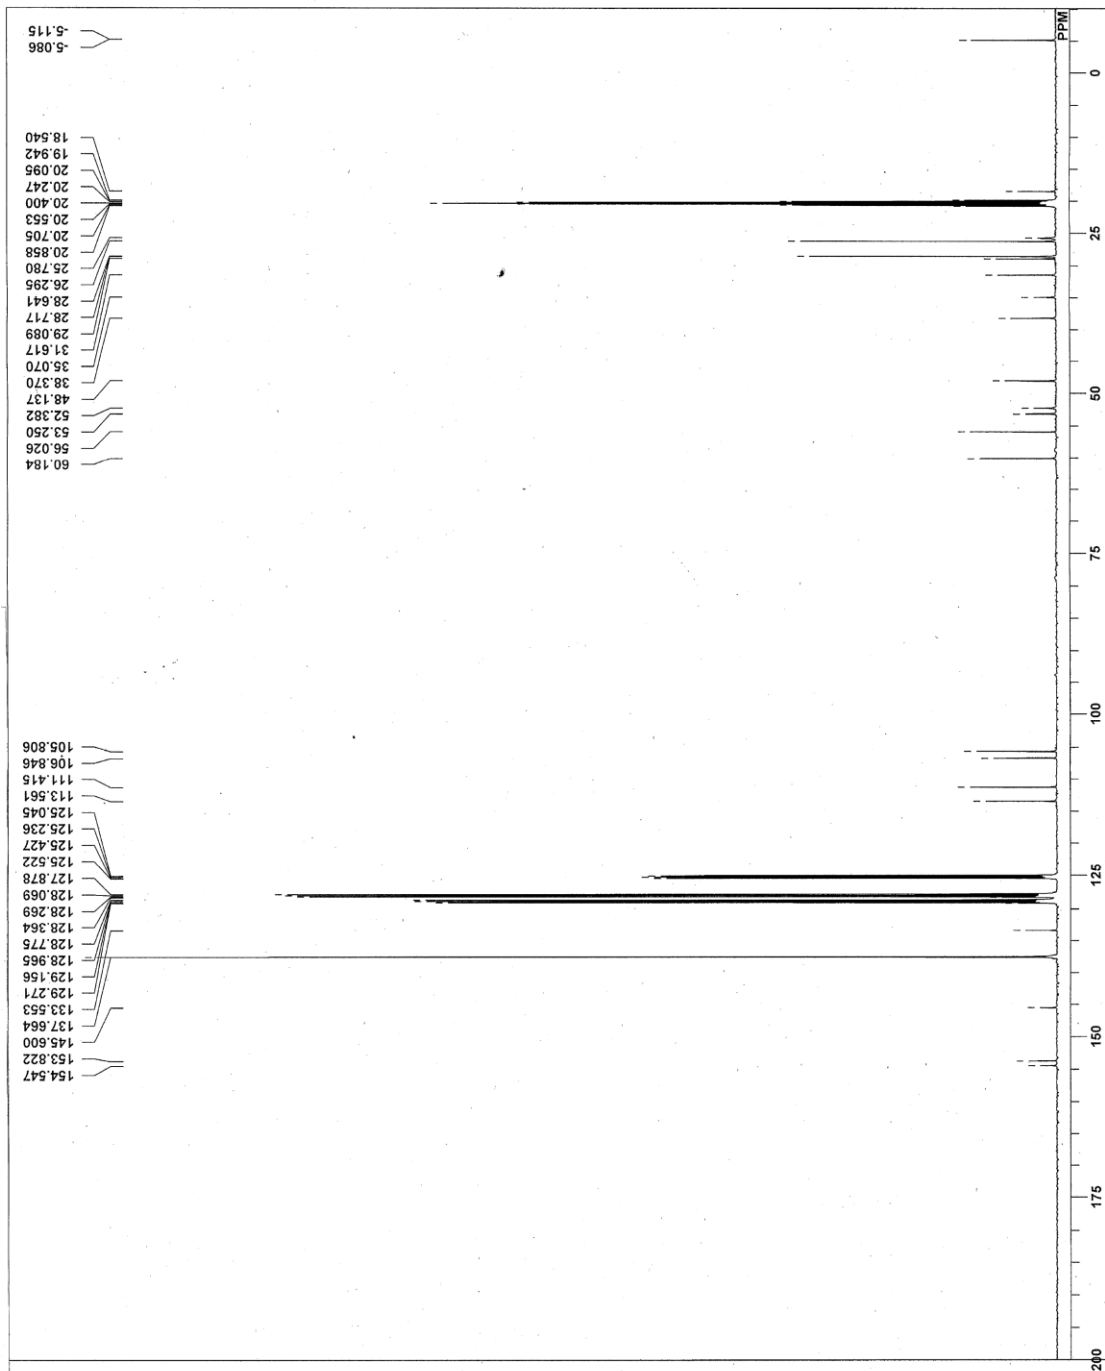

Supplement: b907210a.pdf [file b907210a.pdf]
